1 **Protein Interaction Screen on Peptide Matrix (PRISMA) reveals interaction footprints**  
2 **and the PTM-dependent interactome of intrinsically disordered C/EBP $\beta$**

3

4 Gunnar Dittmar<sup>†,1,2,3</sup>, Daniel Perez Hernandez<sup>\*2,3</sup>, Elisabeth Kowenz-Leutz<sup>\*2</sup>, Marieluise  
5 Kirchner<sup>\*2,3</sup>, Günther Kahlert<sup>2</sup>, Radoslaw Wesolowski<sup>2</sup>, Katharina Baum<sup>2</sup>, Maria Knoblich<sup>2</sup>,  
6 Arnaud Muller<sup>1</sup>, Jana Wolf<sup>2</sup>, Ulf Reimer<sup>4</sup> and Achim Leutz<sup>†,2,5,6</sup>

7

8 <sup>†</sup>corresponding authors, senior authors; [aleutz@mdc-berlin.de](mailto:aleutz@mdc-berlin.de); [Gunnar.Dittmar@lih.lu](mailto:Gunnar.Dittmar@lih.lu)

9 <sup>\*</sup>these authors contributed equally

10

11 **Addresses and Affiliations**

12

13 <sup>1</sup>Proteome and Genome research laboratory, Luxembourg Institute of Health, 1a Rue  
14 Thomas Edison, 1225 Strassen, Luxembourg.

15

16 <sup>2</sup>Max Delbrück Center for Molecular Medicine, Robert-Roessle Strasse 10, 13125 Berlin,  
17 Germany.

18

19 <sup>3</sup>BIH Core Facility Proteomics, Robert-Roessle Strasse 10, 10125 Berlin, Germany.

20

21 <sup>4</sup>JPT Peptide Technologies GmbH, Volmerstrasse 5, 12489 Berlin, Germany.

22

23 <sup>5</sup>Humboldt-University of Berlin, Institute of Biology, 10115 Berlin, Germany.

24

25 <sup>6</sup>Lead Contact: Achim Leutz, [aleutz@mdc-berlin.de](mailto:aleutz@mdc-berlin.de)

26

27 **Summary**

28 CCAAT enhancer binding protein beta (C/EBP $\beta$ ) is a pioneer transcription factor that  
29 specifies cell differentiation. C/EBP $\beta$  is intrinsically unstructured, a molecular feature  
30 common to many proteins involved in signal processing and epigenetics. The structure of  
31 C/EBP $\beta$  differs depending on alternative translation start site usage and multiple post-  
32 translational modifications (PTM). Mutation of distinct PTM sites in C/EBP $\beta$  alters designated  
33 protein interactions and cell differentiation, suggesting a C/EBP $\beta$  PTM indexing code  
34 determines epigenetic outcomes. Herein, we systematically explored the interactome of  
35 C/EBP $\beta$  using an array of spot-synthesised C/EBP $\beta$ -derived linear tiling peptides with and  
36 without PTM, combined with mass spectrometric proteomic analysis of protein interactions.  
37 We identified interaction footprints of ~1300 proteins in nuclear cell extracts, many with  
38 chromatin modifying, remodelling and RNA processing functions. The results suggest  
39 C/EBP $\beta$  acts as a multi-tasking molecular switchboard, integrating signal-dependent  
40 modifications and structural plasticity to orchestrate interactions with numerous protein  
41 complexes directing cell fate and function.

42

43 **Keywords:** C/EBP $\beta$ , interactome, intrinsically disordered protein, post-translational  
44 modification, mass spectrometry.

45

46

## Highlights

- Peptide array based interaction proteomics map SLiM and PTM dependent C/EBP $\beta$  interactome
- Novel links between C/EBP $\beta$ , RNA processing, transcription elongation, MLL, NuRD were revealed
- C/EBP $\beta$  structure organizes modular hub function for gene regulatory machinery
- PRISMA is suitable to resolve protein interactions and networks based on intrinsically disordered proteins

## 47 **Introduction**

48 CCAAT enhancer binding proteins (C/EBP $\alpha$ ,  $\beta$ ,  $\delta$ ,  $\epsilon$ ) are basic leucine zipper transcription  
49 factors that regulate chromatin structure and gene expression by dimerisation and binding to  
50 cis-regulatory, palindromic 5'ATTGC•GCAAT3', or quasi-palindromic DNA sites in gene  
51 enhancers and promoters. Prototypic C/EBP $\beta$  is widely expressed, highly regulated at the  
52 post-transcriptional level, and integrated in many signalling events communicating  
53 extracellular cues to epigenetic changes, examples of which include adipogenesis,  
54 haematopoiesis, innate immunity, female fertility, skin function, apoptosis, and cellular  
55 senescence (Nerlov, 2008; Rodier and Campisi, 2011; Tsukada et al., 2011).

56 In early haematopoiesis and adipogenesis, C/EBP $\beta$  acts as a pioneering factor that  
57 orchestrates complex steps in cell fate commitment (Kajimura et al., 2009; Lichtinger et al.,  
58 2012; Muller et al., 1995; Ness et al., 1993; Siersbaek et al., 2011). C/EBP $\beta$  communicates  
59 with numerous other transcription factors, co-factors, histone modifiers, and chromatin  
60 remodelling complexes to alter the susceptibility of chromatin to the gene regulatory  
61 machinery in lymphoid-myeloid trans-differentiation, and accelerates acquisition of the  
62 induced pluripotent state by the Yamanaka set of reprogramming transcription factors (Di  
63 Stefano et al., 2016; Kowenz-Leutz and Leutz, 1999; Stoilova et al., 2013; Xie et al., 2004).  
64 The chromatin and gene regulatory functionality of C/EBP $\beta$  is linked to distinct regions and  
65 post-translational modifications (PTM) that suspend auto-inhibition, direct the activity of  
66 C/EBP $\beta$ , and regulate recruitment of chromatin remodellers and writers of histone  
67 modifications that alter the structure of chromatin (Kowenz-Leutz and Leutz, 1999; Kowenz-  
68 Leutz et al., 2010; Kowenz-Leutz et al., 1994; Lee et al., 2010b; Mo et al., 2004; Pless et al.,  
69 2008; Siersbaek et al., 2011).

70 The complexity and diversity of C/EBP $\beta$  activities in various cell lineages raises the  
71 question of how a single transcription factor can participate in a multitude of regulatory  
72 events. C/EBP $\beta$  functions are controlled by extracellular signalling cascades involving  
73 receptor tyrosine kinases, cytokine receptors, Ras GTPases, MAP kinases, and cAMP and



74 SMAD signalling, and by more complex conditions such as metabolic adaptation,  
75 inflammation, senescence or stress responses (Nerlov, 2008; Rodier and Campisi, 2011;  
76 Tsukada et al., 2011). Previous research suggested that the combinatorial outcome of post-  
77 transcriptional and post-translational modifications in conjunction with intrinsic structural  
78 plasticity enables the C/EBP $\beta$  protein to adopt a plethora of context- and signal-dependent  
79 states that facilitate a variety of interactions (Leutz et al., 2011; Nerlov, 2008; Tsukada et al.,  
80 2011).

81 Post-transcriptional modification of C/EBP $\beta$  generate three isoforms (LAP\*, LAP, LIP)  
82 by alternative translation initiation of the single exon C/EBP $\beta$  transcript. Since consecutive  
83 C/EBP $\beta$  start sites are positioned in the same reading frame, the isoforms vary in their gene  
84 regulatory N-terminal extensions but retain the same C-terminal dimerisation and DNA-  
85 binding bZip domain (Wethmar et al., 2010). The diversity of C/EBP $\beta$  isoforms is further  
86 increased by numerous PTM of amino acid side chains; in addition to phosphorylation of  
87 serine, threonine, and tyrosine residues, lysine acetylation and methylation also occurs, as  
88 does methylation of arginine. Enzymes responsible for PTM of C/EBP $\beta$  include  
89 CARM1/PRMT4, G9A/EHMT2, and CREBBP/KAT3A, all of which serve as epigenetic  
90 histone code writers. The decoration of C/EBP $\beta$  by PTM alters its capacity to engage in  
91 protein-protein interactions (PPI) and to direct cell fate, suggesting that the signal-dependent  
92 C/EBP $\beta$  modification index reflects integration of various upstream signalling events to  
93 adjust its interactome and to determine its gene regulatory and epigenetic capacity (Leutz et  
94 al., 2011). The combination of translational and post-translational modifications may thus  
95 encrypt the dynamic interactome, with C/EBP $\beta$  as the keystone for a wide range of  
96 functional outcomes (Lee et al., 2010b; Sebastian et al., 2005; Sterneck et al., 1997; Stoilova  
97 et al., 2013).

98 The C-terminal third of C/EBP $\alpha$ ,  $\beta$ ,  $\delta$ ,  $\epsilon$  contains highly conserved DNA binding and  
99 basic leucine zipper domains (bZip) that may dimerise within an extended trans-regulatory  
100 bZip network including C/EBP, AP-1, and ATF transcription factors. The N-terminal two-  
101 thirds of C/EBP primary sequences are predicted to be intrinsically disordered regions

102 (IDRs). Phylogenetic analysis nevertheless suggests that the C/EBP N-terminus also  
103 contains several highly conserved short peptide regions (CRs) that are enriched in amino  
104 acids with hydrophobic and bulky side chains. These CRs are discontinuous and separated  
105 by less conserved and family-specific regions of low complexity (LCRs) characterised by a  
106 predominance of small and polar amino acids (Leutz et al., 2011; Tsukada et al., 2011).  
107 Experimental studies involving a large number of deletions and CR/IDR shuffling mutants  
108 suggested a highly modular, context-dependent functionality of N-terminal C/EBP $\beta$  CRs  
109 (Kowenz-Leutz et al., 1994; Lee et al., 2010b; Leutz et al., 2011; Williams et al., 1995).  
110 Screening for interaction partners using N-terminally-derived C/EBP $\beta$  peptides further  
111 supports the notion that many C/EBP $\beta$  interactions may occur in a modular and dynamic  
112 fashion that rely on molecular recognition features (MoRFs) contained in short linear peptide  
113 motifs (SLiMs), in combination with adjacent PTM (Dunker et al., 1998; Leutz et al., 2011;  
114 Tompa et al., 2014; van der Lee et al., 2014; Wright and Dyson, 1999).

115       Comprehension of the dynamics and context-dependent interactions between  
116 structurally flexible SLiMs and various partner proteins is an emerging hallmark of signal  
117 transmission and key to understanding the regulation of chromatin structure and gene  
118 regulation (Minde et al., 2017; Tompa et al., 2014; van der Lee et al., 2014; Wright and  
119 Dyson, 2015). Deciphering the functionality of individual protein regions and PTMs can be  
120 challenging when using full-length proteins due to functional redundancy and compensatory  
121 effects. Based on previous observation of the modular structure and functionality of C/EBP $\beta$   
122 peptide regions, we developed a workflow to systematically explore the interactome by  
123 deconstructing C/EBP $\beta$  using a solid-phase array of small linear peptides. Briefly, synthetic  
124 unmodified and PTM-modified C/EBP $\beta$  tiling peptides were immobilised on a solid matrix  
125 that was subsequently used for affinity enrichment of soluble proteins and protein complexes  
126 from nuclear extracts. Proteins interacting with the C/EBP $\beta$  peptide matrix were then  
127 identified and quantified by mass spectrometry. The assay, termed **PR**otein Interaction  
128 **S**creen on peptide **M**atrices (PRISMA), revealed hundreds of C/EBP $\beta$ - and PTM-specific  
129 protein interactions, and facilitated the identification of dozens of protein complexes as

130 potential interaction partners that left footprints on C/EBP $\beta$ -derived peptides. Based on  
131 comparison with other affinity enrichment approaches, conventional immunoblotting  
132 analysis, and co-occurrence, several protein interactions and protein complexes were  
133 predicted and subsequently confirmed experimentally.

134 The linear C/EBP $\beta$  peptide interactome thus provides a repository of high molecular  
135 resolution data for protein interactions of an intrinsically disordered protein. The PRISMA  
136 approach serves as a basis to explore gene regulatory and PTM-modulated C/EBP $\beta$   
137 functions, and can assist the rational design of mutant proteins for interaction studies. The  
138 workflow is applicable to other regulatory proteins and transcriptional regulators with similar  
139 structural features such as Myc and the various Hox proteins, and may help to discern highly  
140 complex and dynamic transcription factor functions that arise through IDR- and PTM-  
141 regulated interactions.

142

## 143 **Results & Discussion**

### 144 **The C/EBP $\beta$ peptide matrix**

145 The occurrence of novel PTMs on endogenous C/EBP $\beta$  was investigated by mass  
146 spectrometry of C/EBP $\beta$  immunoprecipitates derived from the human anaplastic lymphoma  
147 cell line SU-DHL1 (Anastasov et al., 2010; Jundt et al., 2005). Over 90 PTMs were identified  
148 (**Supplemental Table 1**) which, combined with published data, suggested that more than  
149 130 PTMs may occur on this protein, as summarised in **Figure 1A**. To systematically  
150 explore the linear region and PTM specific C/EBP $\beta$  interactome, we designed a solid matrix  
151 consisting of immobilised peptides spanning the entire primary sequence of rat C/EBP $\beta$  (297  
152 amino acids), as schematically depicted in **Figure 1B** and detailed in **Supplemental Table**  
153 **2**. To cover all linear binding regions of the entire CEBP $\beta$  protein sequence, tiling peptides of  
154 14 amino acids in length with an offset of mostly four amino acids were spot-synthesised on  
155 a cellulose acetate matrix using Fmoc synthesis. Since PTMs were previously shown to  
156 impact on CEBP $\beta$  protein interactions and functionality, PTM peptides with S/T/Y-

157 phosphorylation, K-acetylation, K-, R-methylation, and R-citrullination were included in the  
158 screen matrix. In total, the solid matrix contained 203 immobilised peptides, covering known  
159 and potential post-translational side chain modifications (**Supplemental Table 2**).

160

### 161 **The C/EBP $\beta$ PRISMA screen**

162 To examine the linear CEBP $\beta$  interactome, two replicates of the peptide matrix were  
163 incubated with HeLa nuclear extracts (**Figure 1B**). Individual peptide spots were excised and  
164 bound proteins proteolytically digested and analysed by high-resolution mass spectrometry.  
165 In total, 406 analytical mass spectrometric 1 h runs were performed (approximately 17 days  
166 of measurement) and spectra were interpreted automatically using the MaxQuant software  
167 package.

168 Enrichment efficiency by PRISMA was examined by comparing the PRISMA intensity  
169 distribution with the total proteome of the nuclear extract. Approximately 5100 proteins were  
170 identified and quantified in the nuclear cell extract using the intensity-based absolute  
171 quantification (iBaq) method (Schwanhausser et al., 2011). The copy number of proteins in  
172 the nuclear cell extract and the number of proteins bound in the PRISMA screen spans six  
173 orders of magnitude, suggesting that the identified binders are not biased towards highly  
174 abundant proteins (Smits et al., 2013) (**Supplemental Figure 1A**). Furthermore, the  
175 distribution of peptide/protein interactions was not attributed to physico-chemical parameters  
176 of the peptides, as evidenced by comparison of the accumulated interaction intensities with  
177 peptide hydrophobicity (gravy index) and isoelectric points (**Supplemental Figure 1B, C**),  
178 which were determined for all non-modified PRISMA peptides. These results suggest that  
179 the PRISMA peptides on the matrix retained their specific protein-binding properties.

180

### 181 **Data processing of C/EBP $\beta$ peptide binding proteins**

182 An initial inspection of the two replicate datasets revealed signal intensity variation of the  
183 interacting proteins. The two datasets were therefore integrated to increase robustness, as  
184 outlined in **Figure 1C** and as explained in the Materials and Methods. The main source of  
185 variation arose from proteins that were identified only once on different peptide spots. This  
186 led to single (low confidence) and double (high confidence) identification categories for each  
187 peptide. The signal intensity for each protein was then normalised between 0 and 1 across  
188 all 203 matrix peptides. Individual peptides displayed large differences in binding partner  
189 profiles, further indicating the specificity of the interactions, because random binding would  
190 be expected to result in a more equal distribution of interacting proteins. Further analysis of  
191 the data showed that ~25% of the identified proteins bound to multiple C/EBP $\beta$  peptides  
192 across the array with low but varying intensity. While these proteins may promiscuously bind  
193 to many distant peptides, some sections of the array showed much higher signals. In order  
194 to minimise noise from background binding, signal intensities for each protein were filtered  
195 for binding above 90% of the protein's signal distribution (outlier filtering), removing all  
196 signals below this threshold. Another filtering criterion for discriminating the most robust  
197 interactors was based on the consecutive binding behaviour of tiling peptides of the C/EBP $\beta$   
198 primary sequence. The rationale here is that by shifting the sequence of tiling peptides by four  
199 amino acids, some of the SLiMs and fractions thereof are included in more than one peptide.  
200 This may generate maximal binding signals for peptides containing optimal SLiM and  
201 adjacent supporting amino acids, and attenuate signals from neighbouring peptides in which  
202 the particular SLiM is shifted or only partially included. We used this predicted binding  
203 behaviour to stringently filter the dataset further to remove all proteins that failed the  
204 consecutive binding criterion (**Figure 1D, E**; see also Materials and Methods). In total, 2363  
205 interacting proteins were identified (**Supplemental Table 3**), of which 1384 proteins were  
206 detected in both replicates (**Figure 1D**), and 1302 proteins fulfilled the consecutive binding  
207 criterion and were defined as C/EBP $\beta$  core interactions ( $\beta$ CI; **Figure 1E**).

208

## 209 **Validation of the PRISMA-derived dataset**

210 To assess the biological significance of data derived by PRISMA, we compared PRISMA  
211 data (SET1, SET2,  $\beta$ CI) to previously identified C/EBP $\beta$  interactome data, as shown in  
212 **Figure 1F** (Siersbaek et al., 2011; Steinberg et al., 2012). In addition, we performed pull-  
213 down experiments using full-length C/EBP $\beta$  derived from SU-DHL1 cells and analysed the  
214 interactome by mass spectrometry (**Supplemental Table 4**). In total, 1369 proteins were  
215 significantly enriched in SU-DHL1 C/EBP $\beta$  samples compared with control samples using a  
216 false discovery rate (FDR) cutoff of 5%. The list of SU-DHL1 C/EBP $\beta$  interactors was  
217 included to extend the existing CEBP $\beta$  interaction datasets. The PRISMA core interaction  
218 data covered between 38% and 59% of the affinity purification-based datasets (see  
219 supplemental information). Affinity purification-based datasets were then combined and the  
220 overlap with PRISMA data was determined on the basis of their UniProt identifier entries, as  
221 shown in **Figure 1G** (see Materials and Methods). In total, 47% of data in all three sets were  
222 also found in the PRISMA core interactions, and 64% of PRISMA core interactions were also  
223 found in at least one of the other datasets. To estimate the FDR of the C/EBP $\beta$  interactor  
224 data detected by PRISMA, we employed the method proposed previously (D'Haeseleer and  
225 Church, 2004), which relies on comparing the intersections of protein interaction datasets to  
226 approximate the number of false-positive PPIs. We obtained FDRs of 11.2% and 13.9% for  
227 proteins detected in PRISMA replicates 1 and 2, respectively (SET1 and SET2 in Figure 1D  
228 and E; see Supplementary Information for details). FDRs were reduced to values below 4%  
229 when applying the filtering step leading to PRISMA core interactions. These results suggest  
230 that PRISMA data depict strong overlap and extensive coverage of the interactome related  
231 to native C/EBP $\beta$ . We conclude that the PRISMA method successfully extends the  
232 interactome data and serves as a resource for locating interaction footprints on C/EBPs.

233

## 234 **High-resolution C/EBP $\beta$ interactome footprints**

235 The global protein interaction profile obtained from the C/EBP $\beta$  peptide matrix is depicted as  
236 a non-hierarchically clustered heat map in **Figure 2A**. The numerical distribution of proteins  
237 identified by individual peptides is shown in the upper part of **Figure 2A**. Peptides  
238 representing the DNA binding region (DB) and the C-terminal part of the leucine zipper (LZ)  
239 exhibit the highest number of protein interactions, yet locally-enriched binding hot-spots were  
240 also found with peptides from the N-terminal part of C/EBP $\beta$ .

241 Clusters of protein-peptide interactions tended to colocalise with regions predicted to  
242 undergo disorder-to-order transition during interaction with binding partners and coincide  
243 with the profile of conserved C/EBP $\beta$  regions (CR1–7), interaction and MoRF predictions  
244 (Disfani et al., 2012; Meszaros et al., 2009), as shown in **Figure 2B**. Predicted intrinsically  
245 disordered regions in the transactivating domain (CR1–4), IDR2 (between CR2 and CR3),  
246 and in the regulatory domain between CR7 and the basic/acidic region (IDR7) also displayed  
247 large numbers of interaction partners.

248 Next, PRISMA-derived data were compared with previously mapped C/EBP $\beta$ -  
249 interacting proteins. As shown in **Figure 2C**, both co-activator acetyltransferases, CBP and  
250 P300 (KAT3A/KAT3B) generated highly similar interaction footprints in the transactivation  
251 regions CR4 (strongest binding) and CR3 (additional binding), with some residual binding in  
252 CR2. Both C/EBP $\beta$  and C/EBP $\delta$  have been shown to interact with CBP/p300, and the main  
253 interaction region encompasses the CBP Taz2 domain as well as CR3 and CR4 in both  
254 C/EBPs. Removal of CR3 or CR4, or mutation of a critical tyrosine residue in CR3 or the  
255 DLF motif in CR4 all abrogated interaction with Taz2 and subsequent transcriptional co-  
256 activation (Kovacs et al., 2003; Schwartz et al., 2003). Previously published crystallographic  
257 data revealed that CR3/CR4 regions in C/EBP $\epsilon$  may adopt an L-shaped  $\alpha$ -helical structure  
258 that folds into the p300 Taz2 domain (Bhaumik et al., 2014), in agreement with the  
259 CBP/P300 protein footprints revealed by PRISMA (**Figure 2C**).



260 The multi-subunit Mediator (MED) complex (Conaway and Conaway, 2013; Jeronimo  
261 and Robert, 2017) has also been reported to interact with C/EBP $\beta$  (Mo et al., 2004), and  
262 several MED components were identified in a previously published C/EBP $\beta$  interaction  
263 dataset (Siersbaek et al., 2014) as well as in the SU-DHL1 interactome presented here. As  
264 shown in **Figure 2C**, PRISMA revealed 20 components of the multi-subunit Mediator (MED)  
265 complex that predominantly interact with CR2-, CR3-, and CR4-derived peptides from  
266 C/EBP $\beta$  TAD.

267 CR1 of the LAP\* C/EBP $\beta$  isoform was reported to specify conjugation by SUMO3  
268 (Eaton and Sealy, 2003) and in accordance, PRISMA showed interaction between SUMO3  
269 and CR1. CR1 also interacts with the Brg1/SMARCA4 ATPase of the SWI/SNF/BAF  
270 complex. Moreover, the Brg1-CR1 interaction is sensitive to methylation of arginine 3  
271 (Kowenz-Leutz et al., 2010). Consistent with these results, PRISMA revealed interaction of  
272 Brg1 with the unmodified CR1 peptide but not with the methylated peptide (**Supplemental**  
273 **Table 3**). Moreover, interactions with 10 additional protein components of BAF-SWI/SNF  
274 type protein complexes were detected with various peptides of the C/EBP $\beta$  transactivation  
275 domain and the bZip domain, indicating multiple interactions between C/EBP $\beta$  and  
276 chromatin modifying complexes, as previously suggested (Kowenz-Leutz and Leutz, 1999).

277

## 278 **The landscape of CEBP $\beta$ protein interactions**

279 PRISMA data (SET1 and SET2) were inspected for enrichment of gene ontology (GO)  
280 terms, protein families and protein domains. As shown in **Table 1**, sorting of C/EBP $\beta$   
281 interaction hits based on the quantity of terms resulted in exceedingly low Benjamini-  
282 Hochberg corrected FDRs (cut-off at a Benjamini-Hochberg corrected  $p$ -value of 0.01) (Finn  
283 et al., 2017; Finn et al., 2016; Gene Ontology, 2015). Strongly enriched terms included  
284 'nucleic acid binding' (745 hits), 'gene expression' (611 hits), 'protein binding' (534 hits),



285 'regulation of transcription' (301 hits), 'cell cycle' (211 hits), 'RNA splicing' (172 hits), and  
286 several terms involving transcription, chromatin binding and remodelling. Gene set  
287 enrichment analysis showed that approximately 25% of PRISMA replicate validated proteins  
288 (267) fell into categories that involve GO terms related to RNA processing (FDR 5.63e-128).  
289 RNA binding proteins that contain a RNP-1 RNA binding domain fall into three classes that  
290 preferentially interact with the C/EBP $\beta$  bZip domain and the adjacent Fork and BA motifs,  
291 while a third group interacts with the CR2 region. A similar binding pattern was found for  
292 DEAD-box helicases, a group of enzymes involved in ATP-driven conformational adjustment  
293 of ribonucleoprotein assembly.

294 Protein domain enrichment using InterPro and PFAM databases revealed nucleotide  
295 binding proteins (102 hits), RNA binding proteins (80 hits), armadillo, WD40, histone fold,  
296 and DEAD box domain proteins as major C/EBP $\beta$  interaction partners. The number of  
297 domain hits obtained using standard algorithms to search protein domain databases may be  
298 underrepresented, because manual curation of PRISMA data increased the number of hits  
299 for WD40 domain proteins (IPR017986: WD40 repeat, region) from 32 to 40, and the  
300 number for DEAD box proteins (IPR011545: DNA/RNA helicase; DEAD/DEAH box type, N-  
301 terminal) from 20 to 24.

302 The C/EBP $\beta$  structure is predicted to fold back onto itself, permitting intramolecular  
303 signalling, or to stretch out to allow contact with several interaction partners simultaneously  
304 (Kowenz-Leutz et al., 1994; Lee et al., 2010a; Lynch et al., 2011). A strong indication of the  
305 involvement of multiple contacts with interaction partners through adjacent or distant  
306 C/EBP $\beta$  regions is shown in **Supplemental Figure 2A** that lists multivalent interactions,  
307 including potential interactions with different proteins of the same complex.

308 Discrete parts of the C/EBP $\beta$  primary structure have previously been assigned to  
309 different biochemical or cellular functions. Protein binding data from different C/EBP $\beta$   
310 regions was extracted and GO term analysis performed for each of the regions to map  
311 structure-function relationships, as shown in **Supplemental Figure 2B**. While some  
312 functional attributions displayed partition over several regions of C/EBP $\beta$  (regulation of gene

313 expression, RNA splicing), others are more localised to distinct regions. For example, basic  
314 and DNA binding regions shows strong enrichment for 'regulation of mitotic cell cycle  
315 processes' or 'nuclear export' whereas 'nuclear import' is associated with CR5, CR7, IR7  
316 and LZ. While the C-terminal region of C/EBP $\beta$  is involved in the majority of GO terms,  
317 transcription factor coactivator functions are mainly associated with N-terminal activation of  
318 CR2, CR3, CR4 and IR7.

319

### 320 **C/EBP $\beta$ -interacting protein complexes**

321 Next, PRISMA data were analysed for potential enrichment of large protein complexes  
322 interacting with CEBP $\beta$ . In addition to anticipated C/EBP $\beta$  interacting complexes such as the  
323 basic RNA polymerase II transcription machinery or Mediator, previously unknown  
324 interrelations became apparent. These included potential complexes involved in the RNA  
325 transcript processing machinery responsible for transcript capping, splicing, termination, and  
326 polyadenylation. Interactions included 3'end processing, cleavage and polyadenylating  
327 factor (CPSF1, 3, 7, 30, and 100), and several components of the Integrator complex  
328 involved in snRNA expression and the RNA exosome (EXOSC2, 4, 6, 7, 8, 9, and 10).  
329 Furthermore, many components of the nuclear pore and associated adapter complexes were  
330 identified. In addition, components of the transcript export THO-TREX complex, including  
331 THO1, 2, 3, 5, 6, 7, Aly, DDX39, and the THO-TREX-associated mRNA export factors Nxf1-  
332 Nxt1 were identified, along with a large number of heterogeneous nuclear ribonucleoproteins  
333 that may couple transcript splicing, maturation, and the formation of messenger  
334 ribonucleoprotein particles. Taken together, these data imply the existence of a previously  
335 unknown connection between CEBP $\beta$  and several steps involved in transcript generation,  
336 processing, maturation, and transport (Muller-McNicoll and Neugebauer, 2013;  
337 Wickramasinghe and Laskey, 2015).

338 Proteins co-occurring in both the PRISMA and SU-DHL1 proteomic data were then  
339 systematically explored to identify soluble protein complexes listed in the CORUM database

340 (2017-03-06) using the g:Profiler bioinformatics toolkit (Reimand et al., 2016; Ruepp et al.,  
341 2010). A list of 1432 human protein complexes built from 2678 proteins (single UniProt  
342 identifier; ID) was derived after removal of redundant and non-human complex entries.  
343 Proteins listed in PRISMA replicates (SET1+SET2) and protein interactions derived from  
344 SU-DHL1 IP-mass spectrometry data were matched by UniProt and gene name ID using  
345 Perseus version 1.5.2.4 (Tyanova et al., 2016). Redundant gene names and isoform entries  
346 were merged into a single UniProt ID for each protein. Altogether, 816 proteins of the  
347 PRISMA-derived dataset and 490 proteins of the IP SU-DHL1 dataset were included in any  
348 of the 1432 CORUM complexes. The 1432 CORUM complexes were then ranked by a  
349 combination of two criteria: (i) the percentage of proteins in complexes obtained by PRISMA,  
350 and (ii) deviation from randomness of the coverage of the complexes obtained by PRISMA  
351 and SU-DHL1 (*p*-values with CORUM background, see Supplementary Information for  
352 details). Considering only complexes sharing at least one protein with the PRISMA dataset  
353 and which have at least three overlaps with PRISMA and SU-DHL1 data resulted in a ranked  
354 list of 417 candidate complexes (**Supplemental Table 5 and Supplemental Figure 3**).  
355 Whenever possible, complexes were grouped into categories indicating functional  
356 connections, such as DNA repair, nuclear pore or centromere, in addition to well-  
357 characterised multi-subunit complexes, such as Mediator, SWI/SNF, MLL, NuRD, and  
358 others. As shown in **Figure 3A**, 45 multi-protein complexes and categories were extracted,  
359 and normalised protein interaction values at any of the 203 C/EBP $\beta$  peptides were summed  
360 over all instances of the category in the list and depicted as a bar-plot to visualise the  
361 distribution of interaction sites of different categories or complexes in relation to the C/EBP $\beta$   
362 primary sequence. These 45 entities were composed of 30 complexes or categories  
363 representing the full upper quartile of the ranked complex list (i.e. up to rank 104,  
364 **Supplemental Table 5**, with minor exceptions, **Supplemental Figure 3**), together with 15  
365 lower-ranking functional counterparts. **Figure 3B** shows prominent node-link diagrams of a  
366 selection of 14 multi-protein complexes among the highest-ranking categories that share  
367 many proteins identified by both PRISMA and SU-DHL1 immunoprecipitation methods.

368

369 **Validation of region- and PTM-specific C/EBP $\beta$  interactions**

370 Next, conventional protein pull-down, immunoprecipitation, and immunoblotting analysis was  
371 used in combination with CEBP $\beta$  mutants to validate data from the PRISMA-derived  
372 interactome (**Figure 4**). According to PRISMA, RelA and NUP50 both predominantly  
373 interacted with peptides located in CR7. Bacterially expressed GST-C/EBP $\beta$  constructs were  
374 probed with HEK293 extracts to examine RelA and NUP50 interactions. As shown in **Figure**  
375 **4B**, affinity capture with GST-CEBP $\beta$  constructs and immunoblotting confirmed CR7 as the  
376 interaction site for both proteins.

377 The histone acetyltransferase GCN5 of the SAGA complex and the DNA  
378 methyltransferase-associated protein DMAP1 of the NuA4/TIP60 complex are involved in a  
379 wide variety of developmental and genome regulatory activities, including transcription, DNA  
380 repair, DNA methylation, and chromatin remodelling (Mohan et al., 2006; Weake and  
381 Workman, 2012). DMAP1 and GCN5 engage in major binding to CR3 and CR4,  
382 respectively, and minor binding elsewhere in C/EBP $\beta$ . Various C-terminally FLAG-tagged  
383 C/EBP $\beta$  mutant constructs lacking CR1, CR2 (5D43), the entire TAD (5D141), CR4  
384 (LAP\* $\Delta$ 4), CR7 (LAP\* $\Delta$ 7), or both (LAP\* $\Delta$ 4,7) were expressed in HEK293 cells to examine  
385 selective and multi-site interaction with resident DMAP1/GCN5 or their respective  
386 complexes. As shown in **Figure 4C and D**, pull-down and immunoblotting revealed that  
387 removal of the DMAP1 minor binding site in CR2 partially abrogated the interaction, and  
388 removal of binding to CR3 completely abrogated the interaction. Similarly, removal of the  
389 major binding site for GCN5 located in CR4 strongly affected GCN5 association, and  
390 deletion of the ancillary binding site in CR7 entirely abolished binding to C/EBP $\beta$ .

391

## 392 **The impact of PTMs on C/EBP $\beta$ -mediated interactions**

393 Detection of PTM-dependent protein interactions in linear C/EBP $\beta$  peptides was a major  
394 objective for the development of the PRISMA screening method. Protein binding to each  
395 PRISMA peptide and its PTM-modified versions were therefore examined. The binding  
396 signal for each protein was normalised against the signal from the corresponding unmodified  
397 peptide to compare enhanced or reduced binding. Interacting proteins were then clustered,  
398 as shown in **Supplemental Figure 4**. Depending on PTM, as exemplified in **Figure 5A**,  
399 interactions fell into four categories; (i) PTM-independent binding, (ii) generally enhanced  
400 binding, (iii) generally repressed binding, and (iv) PTM-specific binding. Most of the identified  
401 binding partners were indifferent to the type of PTM and were classified as binding proteins  
402 that may recognise parts of the primary peptide sequences. Generally enhanced binding  
403 may in part relate to the fact that many PTMs increase hydrophobicity and may thus  
404 enhance interactions non-specifically. The most interesting binding partners are expected to  
405 be found in the last two categories and represent proteins that are disturbed by any PTM in  
406 the peptide or represent interaction partners that were attracted or repelled by a particular  
407 PTM. Examples of the latter are DMAP1 binding to CR3 or RelA, and TLE3 binding to CR7,  
408 the binding of which depends on the methylation status of arginine residues that were  
409 subsequently examined.

410 The transactivation region CR3 (residues 53–68: AIGEHERAIDFSPYLE) contains an  
411 arginine residue that is conserved in C/EBP $\beta$  but not in C/EBP $\alpha,\delta,\epsilon$  and was previously  
412 found to be methylated (Leutz et al., 2011). The PRISMA data suggested that DMAP1  
413 binding to CR3 depends on methylation of R59. Another interaction hot-spot was mapped to  
414 the start site of the highly conserved, alternatively initiated LIP C/EBP $\beta$  isoform that also  
415 represents part of the regulatory region CR7 (residues 158–170: FPFALRAYLGYQAT). The  
416 respective arginine residues in both chicken (R60, R193) and rat (R58, R162) were  
417 previously found to be methylated. Mutation of the equivalent amino acid residue to  
418 alanine/leucine in chicken C/EBP $\beta$  strongly altered transcriptional activity, suggesting that

419 the methylation status of the conserved arginine in CR7 may be critical (Leutz et al., 2011).  
420 WT C/EBP $\beta$ , methylation-defective R60A and R193A, and methylation mimicking R60L and  
421 R193L constructs were subjected to co-immunoprecipitation to compare alterations in  
422 binding, as shown in **Figure 5B**. As suggested by PRISMA, interaction of all three proteins  
423 with C/EBP $\beta$  was sensitive to the amino acid side chain configuration at the respective  
424 arginine positions, demonstrating both amino acid and PTM specificity, in addition to  
425 evolutionary conservation of chicken and rat C/EBP $\beta$  interactions. Binding of DMAP1 to  
426 C/EBP $\beta$  tolerated the R60L exchange but not the R60A exchange, confirming the side chain  
427 specificity and preference for increased side chain hydrophobicity. RelA bound more strongly  
428 to the R193A mutant than the R193L mutant, confirming rejection by increased  
429 hydrophobicity, as represented by methylation of R193. By contrast, the TLE3 co-repressor  
430 (Agarwal et al., 2015) strongly favoured binding to the R193L mutant, suggesting an  
431 increase in hydrophobicity but not the positive charge of the arginine side chain was  
432 important for interaction with TLE3. The immunoprecipitation order of TLE3 was thus  
433 reversed to further validate the preference of TLE3 for the R to L mutation. As shown in  
434 **Figure 5C**, co-immunoprecipitation of C/EBP $\beta$  with TLE3 preferentially occurred with  
435 C/EBP $\beta$  R193L, but not with R193 or R193A. Next, we identified R193 in C/EBP $\beta$  as a target  
436 of the arginine methyltransferase PRMT4/CARM1. As shown in **Figure 5D**, co-  
437 immunoprecipitation of TLE3 together with WT C/EBP $\beta$  was dependent on co-expression of  
438 PRMT4/CARM1. Importantly, and irrespective of the presence of PRMT4/CARM1, the  
439 methylation-defective C/EBP $\beta$  R193A mutant failed to bind TLE3, confirming C/EBP $\beta$  CR7  
440 arginine side chain methylation as a prerequisite for binding of the TLE3 groucho-type co-  
441 repressor. We conclude that many C/EBP $\beta$  interactions, as exemplified by DMAP1, RelA,  
442 and TLE3, are methylation sensitive and that PRISMA was able to uncover PTM-mediated  
443 regulation of PPIs.

444

445 **Novel connections between C/EBP $\beta$ , transcription elongation, MLL, and NuRD**

446 Of particular interest was the observation that many proteins forming part of the machinery  
447 involved in RNA polymerase II (RNAPII) pausing and elongation were included in the  
448 PRISMA data. Components of the trithorax MLL/Set1/COMPAS histone H3 lysine 4 (H3K4)  
449 methyltransferase complexes (Shilatifard, 2012) were also represented in the dataset,  
450 raising the possibility of a connection between C/EBP $\beta$ , enhancer/promoter binding, and  
451 regulation of RNAPII processivity. Many components implicated in both processes were  
452 found, including the MLL complex components CHD3 and 4 (Mi-2), ASH2, Dpy30, PTIP,  
453 HCF-1, the general transcriptional elongation factor B (TFIIS) and associated elongin A/B/C  
454 factors (Aso et al., 1995), the P-TEFb components cyclinK/T1, cdk9, and additional  
455 regulatory components including LARP7, HEXIM1, SPT5 (DSIF), and the chromatin adaptor  
456 bromodomain factor Brd4 and components of the super elongation complex (SEC) including  
457 AF9, PCAF1, and AF4 (AFF1) (Luo et al., 2012). AFF1 is a central SEC scaffold component,  
458 and AF9 and ENL are highly similar YEATS domain family members that compete for  
459 binding to AFF1. The N-terminal YEATS domain of AF9 and ENL both bind to the PAF  
460 complex to connect SEC to RNAPII on chromatin templates. The CDK9/CYCT1 P-TEFb  
461 complex is required for rapid transcriptional induction, phosphorylation of the C-terminal  
462 domain of RNAPII, and engagement of BRD4, which also interacts with H3K9ac. P-TEFb is  
463 also associated with a 7SK snRNA subcomplex that contains the regulatory components  
464 LARP7, HEXIM1, and SPT5 (DSIF) and connects to PAFc in the dynamic transcription  
465 elongation machinery (He et al., 2011; Luo et al., 2012; Peterlin and Price, 2006). In  
466 addition, the histone chaperone FACT complex facilitates passage of the transcription  
467 apparatus through chromatin and is thought to restore the chromatin structure and the  
468 epigenetic state during transcription, replication and repair (Hammond et al., 2017; Hondele  
469 and Ladurner, 2013; Orphanides et al., 1998).

470 Immunoprecipitation and immunoblotting was performed in order to validate several  
471 of these novel connections. As shown in **Figure 6**, multiple MLL, FACT, and SEC  
472 components were all co-immunoprecipitated with C/EBP $\beta$ , confirming the predictive capacity  
473 of PRISMA. It is also important to note that AFF1, AF9, and ENL are among the most



474 frequent oncogenic fusion partners with the MLL gene product that transforms early  
475 haematopoietic progenitors and causes childhood leukaemia by short-circuiting enhancer  
476 and promoter activation and transcriptional elongation checkpoint controls (Krivtsov and  
477 Armstrong, 2007; Shilatifard, 2012; Slany, 2009; Smith et al., 2011).

478         The Mi2/**Nucleosome Remodelling Deacetylase** (NuRD) corepressor complex is  
479 widely expressed and maintains chromatin in a closed state via ATP-dependent chromatin  
480 remodelling and histone tail deacetylation. Some of the NuRD components (CHD3/4(Mi2),  
481 HDAC1, RBBP4/7, MTA1,2, GATAD2A/p66 $\alpha$ , MBD2, MBD3) identified by PRISMA, SU-  
482 DHL1 IP and other approaches (Steinberg et al 2012; Siersbaek et al 2014) are shared with  
483 the SIN3A and CoREST repression complexes (Gregorette et al 2004), and all were  
484 implicated by CORUM analysis (**Figure 3, Supplemental Figure 3, Supplemental Table 4**).  
485 Two major NuRD complexes contain either the unique methyl-CpG binding proteins MBD3  
486 or MBD2, the latter of which may also associate with the WDR77(MEP50)/PRMT5 sub-  
487 module (Le Guezennec et al., 2006; Zhang and Yinghua, 2011). Immunoprecipitation of  
488 either MBD2 or MBD3 revealed association of C/EBP $\beta$ , Mi2, and MTA with both MBD  
489 components, whereas only MBD2 co-precipitated with the WDR77(MEP50)/PRMT5 sub-  
490 module, suggesting that C/EBP $\beta$  may associate with both types of NuRD complexes.

491         In conclusion, the PRISMA technique reveals a comprehensive and PTM-dependent  
492 interactome of the disordered hub transcription factor C/EBP $\beta$ , and permits the detection of  
493 footprints of protein interactions and protein complexes. It appears that C/EBP $\beta$  is involved  
494 at the nexus between enhancer and promoter regulation, in all aspects of pre- and  
495 posttranscriptional control including initiation and pausing control, splicing and exosomal  
496 RNA degradation, polyadenylation, RNA maturation and nuclear export. PRISMA has been  
497 developed for analysis of the interactome of proteins with a high degree of intrinsic disorder.  
498 Such proteins lack a defined 3D structure, and protein interactions and complex formation  
499 are based on SLiMs, PTMs, and intrinsic flexibility. SLiM interactions often occur with high  
500 specificity but low affinity to enable multiple contacts of a dynamic nature and IDRs in



501 conjunction with PTMs may facilitate structural transitions in partner protein exchanges  
502 (Wright and Dyson, 2015). The high local concentration of peptides in matrix spots may limit  
503 free diffusion and thus overcome the affinity/dissociation problem of low affinity interactions  
504 (Ruthenburg et al., 2007). These features permit the detection of weak interactions and  
505 interactions with rare protein partners. The interaction screen developed herein is  
506 augmented by inclusion of amino acids with modified side chains to enable detection of  
507 PTM-dependent interactions on a global scale. Together, the footprints of interactions and  
508 PTM-dependent data may help in the rational design of mutants to explore the functional  
509 C/EBP $\beta$  interactome, and aid in the development of screens for pharmacological inhibitors of  
510 interactions.

511

## 512 **Material & Methods**

### 513 **Peptide matrix synthesis**

514 Peptides were synthesised using the automated high-throughput SPOT-synthesis method  
515 (Kramer and Schneider-Mergener, 1998). Briefly, Whatman 50 cellulose membranes  
516 (Whatman, UK) were functionalised by coupling of Fmoc-protected  $\beta$ -alanine in defined  
517 spots. Subsequently, peptides were synthesised stepwise using standard Fmoc-chemistry.  
518 After each coupling step before Fmoc-deprotection, peptides that failed coupling of building  
519 blocks were acetylated to avoid false sequences.

### 520 **Interaction screen**

521 The peptide matrix membrane was blocked with yeast tRNA (1 mg/ml; Invitrogen, Karlsruhe,  
522 Germany) in binding buffer (20 mM HEPES pH 7.9, Merck, Germany, 0.2 mM EDTA, Merck,  
523 Germany, 100 mM KCl Merck, Germany, 20% glycerol, Merck, Germany, 0.5 mM DTT,  
524 Merck, Germany) to minimise unspecific protein binding. The membrane was then incubated  
525 with HeLa cell nuclear extract (5 mg/ml; Calbiotech S.A, Germany) in binding buffer

526 supplemented with 0.5 mM PMSF (Merck, Germany) for 30 min, then briefly washed with  
527 binding buffer. Peptide spots were individually excised and bound proteins converted to  
528 peptides using a two-step digest with endopeptidase LysC (Wako, Japan) followed by  
529 sequencing-grade trypsin (Promega, Germany) using a robotic setup (Kanashova et al.,  
530 2015). Peptide extracts were purified and stored on stage tips (Rappsilber et al., 2007). Two  
531 replicates were measured for each peptide spot.

### 532 **Mass spectrometry measurement for PRISMA**

533 Peptides were cleaned up using a stage-tip micro column (Rappsilber et al., 2007) and  
534 resuspended in water with 0.1% formic acid (Merck, Germany). Peptides were separated on  
535 a 15cm reverse-phase column (packed in-house, 75 µm inner diameter, 3 µm C<sub>18</sub>-Reprosil  
536 beads; Dr Maisch GmbH, Ammerbruch, Germany) using a gradient to 40% acetonitrile  
537 (Merck, Germany) developed over 1 h 5 min. Separated peptides were ionised on a Proxeon  
538 ion source and directly sprayed into the online-coupled VELOS-OrbiTRAP mass  
539 spectrometer (Thermo scientific). MS<sup>1</sup> spectra were recorded with a mass resolution of  
540 60,000 in the orbitrap part of the machine. MS<sup>2</sup> spectra were recorded in the VELOS. The  
541 ten most intense ions with a charge state greater than 1 were selected (target value = 500;  
542 monoisotopic precursor selection enabled) and fragmented in the linear quadrupole trap  
543 using CID (collision induced dissociation, 35% normalised collision energy). Dynamic  
544 exclusion for selected precursor ions was 60 s. Recorded spectra were analysed using  
545 MaxQuant software package version 1.2.2.5 (Cox and Mann, 2008) and the human IPI  
546 database (version 3.3.72), allowing for 2 missed cleavages. Fixed modifications were set to  
547 cysteine carbamylation, and variable modifications were set to methionine oxidation, as well  
548 as N-terminal protein acetylation. Each replicate was analysed separately with the label-free  
549 option activated for data quantification (Cox et al., 2011).

### 550 **Analysis of nuclear cell extracts**

551 Nuclear cell extracts were supplemented with the USP2 standard (Merck, Germany) and  
552 digested as described above on an automated digestion setup (Kanashova et al., 2015).  
553 Peptides were fractionated by RP-HPLC with Proxeon nLC2 and further analysed by a  
554 QExactive mass spectrometer (Thermo Scientific). The mass spectrometer was operated in  
555 a data-dependent acquisition mode with dynamic exclusion enabled (30 s). MS<sup>1</sup> (mass  
556 range 300-1700 Th) was acquired at a resolution of 70,000 with the ten most abundant  
557 multiply charged ( $z \geq 2$ ), ions selected with a 2 Th isolation window for HCD (Higher-energy  
558 collisional dissociation) fragmentation. MS<sup>2</sup> scans were acquired at a resolution of 17,500  
559 and injection time of 60 ms.

#### 560 **Full-length C/EBP $\beta$ interactome analysis by AP-MS mass spectrometry**

561 Eluates from control immunoglobulins (IgG) and anti-C/EBP $\beta$  pull-downs (four replicates  
562 each) were ethanol precipitated and protein pellets were solubilised in urea buffer (6 M urea,  
563 2 M thiourea, 20 mM HEPES pH 8), reduced for 30 min at RT in 10 mM DTT, followed by  
564 alkylation with 55 mM chloroacetamide (Merck, Germany) for 20 min in the dark at RT. The  
565 endopeptidase LysC (Wako, Japan) was added at a protein:enzyme ratio of 50:1 and  
566 incubated for 4h at RT. After dilution of the sample with 4 $\times$  digestion buffer (50 mM  
567 ammonium bicarbonate pH 8), sequence-grade modified trypsin (Promega, Darmstadt,  
568 Germany) was added (protein:enzyme ratio = 100:1) and digested overnight. Trypsin and  
569 LysC activity was quenched by acidification with trifluoroacetic acid (TFA) added to pH ~2.  
570 Afterwards, peptides were extracted and desalted using the standard StageTip protocol  
571 (Rappsilber et al, 2003). Peptide mixtures were separated by reverse-phase  
572 chromatography using an Eksigent NanoLC 400 system (Sciex, Darmstadt, Germany) on in-  
573 house-manufactured 20 cm fritless silica microcolumns with an inner diameter of 75  $\mu$ m.  
574 Columns were packed with ReproSil-Pur C18-AQ 3  $\mu$ m resin (Dr Maisch GmbH). Peptides  
575 were separated using an 8–60% acetonitrile gradient (ran over 224 min) at a nanoflow rate  
576 of 250 nl/min. Eluting peptides were directly ionised by electrospray ionisation and analysed

577 on a Thermo Orbitrap Fusion instrument (Q-OT-qIT, Thermo). Survey scans of peptide  
578 precursors from 300 to 1500  $m/z$  were performed at 120 K resolution with a  $2 \times 10^5$  ion count  
579 target. Tandem MS was performed by isolation at 1.6  $m/z$  with the quadrupole, HCD  
580 fragmentation with a normalised collision energy of 30, and rapid scan MS analysis in the ion  
581 trap. The MS<sup>2</sup> ion count target was set to  $2 \times 10^3$  and the max injection time was 300 ms.  
582 Only precursors with a charge state of 2–7 were sampled for MS<sup>2</sup>. The dynamic exclusion  
583 duration was set to 60 s with a 10 ppm tolerance around the selected precursor and its  
584 isotopes. The instrument was run in top speed mode with 3 s cycles, meaning the instrument  
585 could continuously perform MS<sup>2</sup> events until the list of nonexcluded precursors diminished to  
586 zero or 3 s. Data were analysed by MaxQuant software version 1.5.1.2. The internal  
587 Andromeda search engine was used to search MS<sup>2</sup> spectra against a decoy human UniProt  
588 database (HUMAN.2014-10) containing forward and reverse sequences. The search  
589 included variable modifications of methionine oxidation and N-terminal acetylation,  
590 deamidation (N and Q) and fixed modification of carbamidomethyl cysteine. The minimal  
591 peptide length was set to seven amino acids, and a maximum of two missed cleavages were  
592 allowed. The FDR was set to 0.01 for peptide and protein identifications. Unique and razor  
593 peptides with a minimum ratio count of 1 were considered for quantification. Retention times  
594 were recalibrated based on the built-in nonlinear time-rescaling algorithm. MS<sup>2</sup> identifications  
595 were transferred between runs with the ‘Match between runs’ option, in which the maximal  
596 retention time window was set to 0.7 min. Statistical analysis was performed using Perseus  
597 version 1.5.2.4. C/EBP $\beta$  pull-down and control samples were defined as groups and proteins  
598 and filtered by intensity value using a ‘minimum value of 3 per group’ as the threshold. After  
599 log<sub>2</sub> transformation, missing values were imputed with random numbers from a normal  
600 distribution with a mean and standard deviation chosen to best simulate low abundance  
601 values below the noise level (width = 0.3; shift = 1.8). Significantly enriched proteins were  
602 determined using a volcano plot-based strategy, combining standard two-sample t-test  $p$ -  
603 values with ratio information. Significance corresponding to an FDR of 5% was determined

604 by a permutation-based method (Tusher et al., 2001). Equal sample load was confirmed by  
605 calculating the ratio of antibody intensities (mean log<sub>2</sub> ratio = 0.1575).

#### 606 **Identification of C/EBP $\beta$ PTM sites by mass spectrometry**

607 Eluates of anti-C/EBP $\beta$  pull-downs were ethanol precipitated and protein pellets were  
608 processed as described above for the interactome analyses. Peptides were analysed on a  
609 Thermo Orbitrap Fusion instrument (Q-OT-qIT, Thermo). Sequential survey scans of peptide  
610 precursors covering different mass ranges (300–600, 550–850, 800–1100, 1050–1700 m/z)  
611 were performed at 120 K resolution with a  $2 \times 10^5$  ion count target on the three most  
612 abundant precursor ions. Tandem MS was performed by isolation at 1.6 m/z with the  
613 quadrupole, HCD fragmentation with a normalised collision energy of 30, and rapid scan MS  
614 analysis in the ion trap. The MS<sup>2</sup> ion count target was set to  $1 \times 10^4$  and the max injection  
615 time was 500 ms. Only precursors with a charge state of 2–7 were sampled for MS<sup>2</sup>. The  
616 dynamic exclusion duration was set to 60 s with a 10 ppm tolerance around the selected  
617 precursor and its isotopes. Data were analysed by MaxQuant software version 1.5.1.2 as  
618 described above for interactome analysis with some modifications; the search included  
619 variable modifications of methionine oxidation and N-terminal acetylation, deamidation (N  
620 and Q), phosphorylation (S, T and Y), acetylation (K), methylation (K and R), dimethylation  
621 (K and R), trimethylation (K) and citrullination (R). Modification of carbamidomethyl cysteine  
622 was set as a fixed modification. The minimal peptide length was set to seven amino acids,  
623 and a maximum of four missed cleavages were allowed. The FDR was set to 0.01 for site  
624 identifications. To filter for confidently identified peptides, the MaxQuant score was set to a  
625 minimum of 40. Identified PTM sites were classified according to their localisation probability  
626 (Class I >0.75, Class II >0.5, Class 3 >0.25). In order to distinguish citrullination from  
627 deamidation, a modification resulting in a similar mass shift of the precursor, both  
628 modifications were included during MaxQuant data analyses as variable modifications, and  
629 at least one missed cleavage was required for citrullination site identification. When arginine

630 and lysine are acetylated or methylated, trypsin often fails to cleave at that site, resulting in  
631 miss-cleaved peptides. Therefore, only the PTM sites, which were identified within the  
632 peptide, but not C-terminally localised, were considered as confidently identified.

### 633 **Combining the two datasets and data filtering**

634 The two datasets of the PRISMA measurement were analysed in two batches due to  
635 restrictions of the MaxQuant software package. The two separate datasets were then  
636 integrated by calculating the average intensity value where two values were available, or by  
637 taking the single measured value if only one intensity measurement was available to prevent  
638 bias against single identifications. Single value intensities were annotated as lower  
639 confidence quantifications. Each of the data rows of the combined dataset, corresponding to  
640 intensity values of one protein over all 203 peptides, was first filtered according to the outlier  
641 criterion  $I_n = 0$  if  $I_n \leq P90$ , where  $I_n$  is the intensity at peptide  $n$ , and P90 is the 90th  
642 percentile of the intensity value distribution of the protein, followed by normalisation against  
643 the intensity of the highest value in each row using  $\frac{I_n}{\max_k(I_k)} = I_n$ , where  $I_n$  is the intensity at  
644 peptide  $n$ . This was followed by an additional filtering step where all proteins were removed  
645 that did not show a consecutive binding pattern according to finding at least one intensity  $I_n$   
646 with  $I_n > 0$  and  $I_{n+1} > 0$  with  $I_n$  as the intensity at peptide  $n$  and only considering peptides  
647 without any PTM.

### 648 **Construction of CORUM networks**

649 For each complex identified in the CORUM database, the corresponding UniProt identifier  
650 was extracted and translated to an ensemblp identifier using the bioDBnet conversion tool  
651 (Mudunuri et al., 2009). For each of the ensemblp identifiers, interactions were extracted  
652 from the STRING resource (Szklarczyk et al., 2015). The interaction network was  
653 constructed using the igraph software package (Csardi G, 2006) and coloured based on the  
654 source the of the interaction from the different datasets.

655 **Relative binding to PTM-modified peptides**

656 For each peptide and its PTM derivatives, the relative binding was calculated. For each  
657 protein and modified peptide, the intensity value of the unmodified form of the peptide was  
658 subtracted. The resulting values were separated into five fractions and clustered according  
659 to their Euclidian distance.

660 **Calculation of peptide properties**

661 For calculation of peptide properties, the R peptides package was used, and properties were  
662 calculated and plotted using the ggplot2 packages (Wickham, 2009).

663

664 **Use of the DAVID package**

665 A total of 1375 identifiers were examined using the Generic Gene Ontology Term Finder  
666 (GGOTF, Princeton University, Lewis-Sigler Institute for Integrative Genomics) to assess  
667 ontology aspects, functions, and components.

668

669 **Immunoprecipitation of endogenous C/EBP $\beta$  for mass spectrometry**

670 Immunoprecipitation of C/EBP $\beta$  from  $4 \times 10^8$  SU-DHL1 cells (anaplastic large cell lymphoma,  
671 DSMZ, ACC 356) was performed after washing twice with phosphate-buffered saline (PBS)  
672 and resuspension in lysis buffer (20 mM HEPES pH 7.5, 150 mM NaCl, 5 mM MgCl<sub>2</sub>, 1 mM  
673 EDTA pH 8), 1  $\mu$ M ZnCl<sub>2</sub> (Merck, Germany), 0.1% NP40 (Sigma, Germany), 2 mM  
674 dithiothreitol (DTT), 2 mM PEFAbloc (Böhringer, Mannheim, Germany) supplemented with  
675 protease inhibitor cocktail (Roche, Germany), and 20 U/ml benzonase (Sigma, Germany).  
676 After incubation on ice for 10 min, lysates were sonicated twice for 1 min, cell debris was  
677 removed by centrifugation at 70,000 g for 30 min, and lysates were filtered through a 0.45  
678  $\mu$ M filter (Whatman, Maidstone, UK) prior to immunoprecipitation. Samples were  
679 immunoprecipitated with a C/EBP $\beta$  antibody mix for 30 min at 4°C (Santa Cruz; C-19 and a  
680 customised polyclonal antibody raised against the human recombinant C/EBP $\beta$  protein) and



681 immunoprecipitates were subsequently collected on Protein-G Dynabeads (Novex, Life  
682 Technologies). Beads were washed twice in lysis buffer without benzonase, once in lysis  
683 buffer without benzonase and NP40, and eluted by incubation with a mix of 6 M urea and 2  
684 M thiourea (Sigma) for 15 min at 25°C. Immunoprecipitation specificities were controlled by  
685 immunoprecipitation of SU-DHL1 lysates with nonspecific rabbit IgG control antibodies  
686 (Santa Cruz, sc-2017) and subsequent collection on Protein-G Dynabeads.

687

### 688 **Cell culture, transfection, immunoprecipitation and immunoblotting**

689 HEKT-293 cells were grown in Dulbecco's modified Eagle medium (DMEM; Invitrogen, USA)  
690 and SU-DHL1 cells were grown in RPMI (Invitrogen, USA) supplemented with 10% FCS and  
691 1% penicillin/streptomycin (Invitrogen, USA). Transfection of plasmids in HEKT-293 cells  
692 was performed by calcium-phosphate precipitation or Metafectene (Biontex, Munich,  
693 Germany) according to the manufacturer's protocol. For validation of PRISMA-identified  
694 C/EBP $\beta$  protein interactions, immunoprecipitation of WT or mutant C/EBP $\beta$  proteins  
695 expressed in HEKT-293 cells was performed as described previously (Kowenz-Leutz et al,  
696 2010). Briefly, cell lysates were prepared in lysis buffer and immunoprecipitation was  
697 performed with appropriate antibodies for 2 h at 4°C. Immunoprecipitated proteins were  
698 collected on Protein-G Dynabeads (Novex), separated by SDS-PAGE (NuPAGE, Thermo-  
699 Fisher, Waltham, USA) and immunoblots were incubated with appropriate antibodies as  
700 indicated and visualised by ECL (GE Healthcare, UK). GST-C/EBP $\beta$  constructs and cloning  
701 of mutant C/EBP $\beta$  proteins were as described previously (Kowenz-Leutz et al 1999; 2010  
702 etc). Antibodies were as follows: anti-C/EBP $\beta$  (Leutz lab), anti-C/EBP $\beta$  (Santa Cruz; C-19),  
703 anti-Flag (Sigma), anti-HA.11 (Covance), anti-TLE3 (Santa Cruz; sc-9124), anti-  
704 WDR77/Mep50 (Biomol; A301-562A), anti-Nup50 (Santa Cruz; sc-133859), anti-Mi2 (Santa  
705 Cruz; sc-11378; Santa Cruz; sc-11378), anti-MBD2 (Santa Cruz; sc-12444), anti-MBD3  
706 (Bethyl; A302-538A), anti-PRMT5 (Millipore; 07-405), anti-MTA1 (Biomol; A200-280A),



707 DMAP1 (Santa Cruz; B-10), anti-RbbP4 (Abcam), Stat3 (Cell signaling; 9132P), anti-RelA  
708 (Santa Cruz; sc-109, anti-GCN5 (H-75; Santa Cruz; SC-20698), anti-ELL (Bethyl; A301-  
709 644A), anti-cyclin T1 (Bethyl; A303-499A-M), anti-CDK9 (Bethyl; A303-493A-M), anti-AF9  
710 (Novus; NB100-1565), anti-MLLT1 (Novus; NBP1-26653), anti-PAF1 (Novus; (NB600-274),  
711 anti-BRD4 (Bethyl; A301-985A50), anti-AF4 (Santa Cruz; sc-99062), anti-GFP (Roche;  
712 11814460001), anti-SSRP1 (Thermo; PA-22186), anti-SPT16 (Thermo; PA1-12697).

713

#### 714 **Homolog mapping and calculation of overlap with known datasets**

715 The two Siersbaek interaction datasets (Siersbaek et al., 2011) are based on the mouse  
716 homolog of C/EBP $\beta$  and thus all identifiers were mapped to human homologs prior to  
717 calculating the overlap between the datasets using the InParanoid Homolog database.  
718 PRISMA data was organised into protein groups reflecting the non-unique mapping of  
719 peptides to the protein sequences. Within PRISMA data, the unique IPI identifiers served for  
720 overlap calculation. Otherwise, the overlap of a set of protein groups (reference dataset) with  
721 another dataset was calculated by determining all mutual UniProt identifiers in the two  
722 datasets and projecting them onto the protein groups of the reference dataset.

723

#### 724 **Calculations of dataset overlaps**

725 Overlap of proteins in the full PRISMA dataset (replicates 1 and 2), the PRISMA core  
726 interaction set, and the three other datasets (MudPIT HeLa, IP 3T3L1, and IP SU-DHL1) and  
727 their union is shown in the following table. Entries in the diagonal capture the total number of  
728 proteins in the dataset.

729

| <b>Second set<br/>Reference set</b> | <b>PRISMA<br/>SET1+SET2</b> | <b>PRISMA<br/>core<br/>interactions</b> | <b>MudPIT<br/>HeLa</b> | <b>IP<br/>3TL3L1</b> | <b>IP SU-<br/>DHL1</b> | <b>Union<br/>HeLa,<br/>3T3L1,<br/>SU-<br/>DHL</b> |
|-------------------------------------|-----------------------------|-----------------------------------------|------------------------|----------------------|------------------------|---------------------------------------------------|
| <b>PRISMA SET1+SET2</b>             | 2363                        | 1302                                    | 57                     | 483                  | 1014                   | 1179                                              |

|                                     |      |      |     |     |      |      |
|-------------------------------------|------|------|-----|-----|------|------|
| <b>PRISMA core interactions</b>     | 1302 | 1302 | 35  | 390 | 716  | 829  |
| <b>MudPIT HeLa</b>                  | 69   | 46   | 118 | 23  | 43   | 118  |
| <b>IP 3T3L1</b>                     | 447  | 372  | 23  | 630 | 349  | 630  |
| <b>IP SU-DHL1</b>                   | 904  | 685  | 41  | 339 | 1369 | 1369 |
| <b>Union (HeLa, 3T3L1, SU-DHL1)</b> | 1078 | 807  | 118 | 630 | 1369 | 1721 |

730

731 **FDR calculation**

732 To estimate the false discovery rate (FDR) of protein-protein interaction (PPI) data sets, we  
 733 employed the method proposed by D’haeseleer and Church (2004) which relies on  
 734 comparing the intersections of two measured datasets with a reference set to approximate  
 735 the number of false-positive PPIs in the measured datasets (see **figure below**). We thereby  
 736 assumed that the reference set and the intersection between the two measured datasets is  
 737 error-free (i.e. they contain no false-positives).

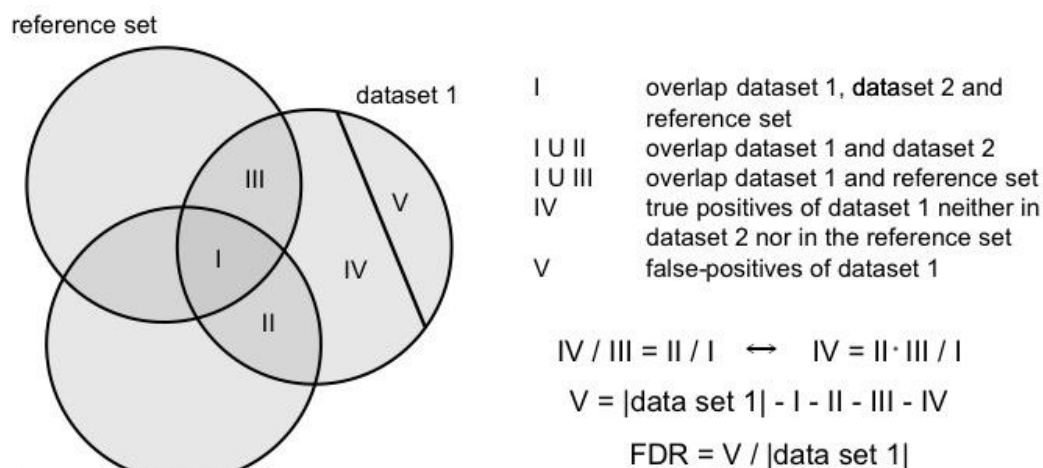

738

739

740 **Figure: Scheme for the calculation of the false discovery rate (FDR) of dataset 1**

741 **according to D’haeseleer & Church (2004).** It is assumed that the intersections of the  
 742 reference set with the datasets (I, III) as well as the intersection between the two datasets  
 743 (II) are nearly error-free. In addition, the method makes use of the assumption that the  
 744 reference set overlaps similarly with dataset 1 and dataset 2 (i.e. the relation  $IV / III = II / I$   
 745 holds.  $|\text{dataset 1}|$  denotes the number of proteins in dataset 1.

746

747 The assumption that the reference set is error-free can be relaxed since we only  
 748 need to be sure that it contains no bias in how it intersects with the first and second  
 749 measured datasets and their intersection [D'haeseleer and Church, 2004]. This can be  
 750 expected if both measured datasets are obtained using the same measurement method,  
 751 which is the case for PRISMA SET1 and SET2.

752 Using the calculation procedure described in **the figure above** for PRISMA SET1  
 753 and SET2 with the union of the IP SU-DHL1, IP 3TL3L1 and MudPIT HeLa datasets as  
 754 reference set, we estimated FDRs of 11.2% and 13.9% for SET1 and SET2, respectively. If  
 755 using as the two measured datasets the restrictions of SET1 and SET2 to proteins also  
 756 occurring in the PRISMA core interaction set, the FDRs were reduced to 2.5% ( $\text{SET1} \cap$   
 757 PRISMA core interactions) and 3.3% ( $\text{SET2} \cap$  PRISMA core interactions). Overlap counts of  
 758 the PRISMA sets and the reference set (union of IP SU-DHL1, IP 3TL3L1, MudPIT HeLa)  
 759 which are needed for FDR calculation (i.e. values for the sizes of areas marked by I, II, III,  
 760 IV, V in the figure above) are given in the following table.

761

|                                                            | Set size | I   | II  | III | IV  | V   | FDR   |
|------------------------------------------------------------|----------|-----|-----|-----|-----|-----|-------|
| <b>SET1</b>                                                | 1896     | 862 | 522 | 186 | 113 | 213 | 11.2% |
| <b>SET2</b>                                                | 1851     | 862 | 522 | 131 | 79  | 257 | 13.9% |
| <b>SET1 <math>\cap</math> PRISMA<br/>core interactions</b> | 1203     | 738 | 359 | 51  | 25  | 30  | 2.5%  |
| <b>SET2 <math>\cap</math> PRISMA<br/>core interactions</b> | 1196     | 738 | 359 | 40  | 19  | 40  | 3.3%  |

762

763

764 **Ranking of CORUM complexes**

765 We ranked the 1432 complexes obtained from the CORUM database as described in the  
766 main text by applying a combination of two criteria: (i) the percentage of proteins of the  
767 complex occurring in PRISMA, and (ii) deviation from randomness of the coverage obtained  
768 for PRISMA and SU-DHL1. Specifically, for (i), we calculated the percentage for each  
769 complex by dividing the number of proteins occurring in the complex from the combined  
770 PRISMA replicates 1 and 2 (SET1 + SET2) with matched identifiers using the Perseus tool  
771 by the total number of proteins in the complex. For (ii), for each complex, we compared the  
772 PRISMA (SU-DHL1) dataset with random protein sets in terms of how many proteins of the  
773 complex are covered. Focusing on CORUM data, we considered only the subset of PRISMA  
774 and SU-DHL proteins which occurred in the 2678 proteins from the 1432 CORUM  
775 complexes, comprising 816 (490) proteins in the PRISMA (SU-DHL) dataset, thus also  
776 giving the size of the corresponding random datasets. We first performed the calculations  
777 separately for PRISMA and SU-DHL for each of the 1432 complexes. For calculation of a  
778 complex of  $C_n > 1$  proteins, of which  $C_p$  proteins with  $0 \leq C_p \leq C_n$  occur in PRISMA, we  
779 estimated the probability of observing at least  $C_p$  of  $C_n$  specific proteins within a random set  
780 of size  $P_n = 816$  drawn from the total set of  $T_n = 2678$  proteins occurring in any of the  
781 CORUM complexes. This is a 'drawing without replacement' scenario (corresponding to the  
782 Fisher's exact test), for which success is represented by drawing one of a specific subset (of  
783 size  $C_n$ ) of proteins, and thus the probability that at least  $X$  successes are obtained can be  
784 calculated as follows:

$$785 \quad P(X \geq C_p) = \sum_{C=C_p}^{C_n} \frac{\binom{C_n}{C} \binom{T_n - C_n}{P_n - C}}{\binom{T_n}{P_n}}$$

786 where  $C_n$  is the maximal number of successes (full coverage of a complex of size  $C_n$ ),  $C$  is  
787 the number of successes (a minimum of  $C = C_p$  proteins of the complex covered because  
788 this is how PRISMA or SU-DHL performed, and a maximum of  $C=C_n$ ),  $T_n = 2678$  (the  
789 number of possible results for drawing, which is the number of different proteins in the 1432  
790 CORUM complexes), and  $P_n$  (the number of draws or size of the random datasets) = 816  
791 (for PRISMA full) and 490 (for SU-DHL1).

792 For calculation of the probabilities for different complexes, the values of  $C_n$  and  $C_p$ ,  
793 but not of  $T_n$  and  $P_n$ , can change. The probabilities correspond to a hypergeometric  
794 distribution, and we employed the appropriate  $R$  base function (`dhyper`) to compute the  
795 values.

796 The obtained probabilities for each complex, one for PRISMA and one for SU-DHL1,  
797 represent how probable it is to obtain the observed (or a more extreme) coverage by  
798 chance. We treated the events for PRISMA and SU-DHL1 as independent and multiplied the  
799 two probabilities for each complex to obtain the probability that both coverages (or a more  
800 extreme) occurred by chance.

801 We ranked the 1432 complexes based on criterion (i) and (ii) separately. For (i), a  
802 high rank corresponded to a high percentage; for (ii), a high rank corresponded to a high  
803 significance (i.e. to a low probability; function rank in  $R$ , average values for ties). We  
804 computed the final ranking from the sum of the two previous rankings (applying minimal  
805 values for ties). The complex list is shown together with the probabilities and rankings in  
806 Supplemental Table 5.

807

## 808 **Author contributions**

809 Conceptualisation, A.L. and G.D.; Methodology, G.D. and A.L.; Investigation, D.P.H. and  
810 G.K.; Validation, E.K.L., R.W., M.Knobl. and M.Kirch.; Resources, G.D., A.L. and U.R.; Data  
811 curation, G.D., D.P.H., K.B., M.Kirch., J.W. and A.M.; Writing original draft, A.L.; Writing  
812 review and editing, A.L., G.D., E.K.L. M.Kirch., K.B., Visualisation, A.L., G.D., A.M., K.B.,  
813 E.K.L. and M.Kirch.; Supervision, project administration, and funding acquisition, A.L. and  
814 G.D.

815

## 816 **Acknowledgements**

817 We would like to thank Manuel Baesler for generating a web tool (Peptide2Protein) for  
818 visualization of PRISMA interactions, Andreas Ladurner, LMU Munich, for FACT expression  
819 plasmid constructs, Bernd Lüscher and Juliane Lüscher-Firzlaff, RWTH, Aachen, for MLL  
820 complex expression plasmid constructs. Part of the work was supported by DFG Grants to  
821 AL, LE770/4-2 and CRC167B11.

822 **References**

823

824 Agarwal, M., Kumar, P., and Mathew, S.J. (2015). The Groucho/Transducin-like enhancer of  
825 split protein family in animal development. *IUBMB Life* 67, 472-481.

826 Anastasov, N., Bonzheim, I., Rudelius, M., Klier, M., Dau, T., Angermeier, D., Duyster, J.,  
827 Pittaluga, S., Fend, F., Raffeld, M., *et al.* (2010). C/EBPbeta expression in ALK-positive  
828 anaplastic large cell lymphomas is required for cell proliferation and is induced by the STAT3  
829 signaling pathway. *Haematologica* 95, 760-767.

830 Aso, T., Lane, W.S., Conaway, J.W., and Conaway, R.C. (1995). Elongin (SIII): a  
831 multisubunit regulator of elongation by RNA polymerase II. *Science* 269, 1439-1443.

832 Bhaumik, P., Davis, J., Tropea, J.E., Cherry, S., Johnson, P.F., and Miller, M. (2014).  
833 Structural insights into interactions of C/EBP transcriptional activators with the Taz2 domain  
834 of p300. *Acta crystallographica Section D, Biological crystallography* 70, 1914-1921.

835 Conaway, R.C., and Conaway, J.W. (2013). The Mediator complex and transcription  
836 elongation. *Biochim Biophys Acta* 1829, 69-75.

837 Cox, J., and Mann, M. (2008). MaxQuant enables high peptide identification rates,  
838 individualized p.p.b.-range mass accuracies and proteome-wide protein quantification. *Nat*  
839 *Biotechnol* 26, 1367-1372.

840 Cox, J., Neuhauser, N., Michalski, A., Scheltema, R.A., Olsen, J.V., and Mann, M. (2011).  
841 Andromeda: a peptide search engine integrated into the MaxQuant environment. *J Proteome*  
842 *Res* 10, 1794-1805.

843 Csardi G, N.T.T.I., *Complex Systems* 1695. 2006. <http://igraph.org/> (2006). the igraph  
844 software package for complex network research,. <http://igraph.org/>.

845 D'Haeseleer, P., and Church, G.M. (2004). Estimating and improving protein interaction error  
846 rates. *Proc IEEE Comput Syst Bioinform Conf*, 216-223.

847 Di Stefano, B., Collombet, S., Jakobsen, J.S., Wierer, M., Sardina, J.L., Lackner, A.,  
848 Stadhouders, R., Segura-Morales, C., Francesconi, M., Limone, F., *et al.* (2016).  
849 C/EBPalpha creates elite cells for iPSC reprogramming by upregulating Klf4 and increasing  
850 the levels of Lsd1 and Brd4. *Nat Cell Biol* 18, 371-381.

851 Disfani, F.M., Hsu, W.L., Mizianty, M.J., Oldfield, C.J., Xue, B., Dunker, A.K., Uversky, V.N.,  
852 and Kurgan, L. (2012). MoRFpred, a computational tool for sequence-based prediction and  
853 characterization of short disorder-to-order transitioning binding regions in proteins.  
854 *Bioinformatics* 28, i75-83.

855 Dunker, A.K., Garner, E., Guillot, S., Romero, P., Albrecht, K., Hart, J., Obradovic, Z.,  
856 Kissinger, C., and Villafranca, J.E. (1998). Protein disorder and the evolution of molecular  
857 recognition: theory, predictions and observations. *Pac Symp Biocomput*, 473-484.

858 Eaton, E.M., and Sealy, L. (2003). Modification of CCAAT/enhancer-binding protein-beta by  
859 the small ubiquitin-like modifier (SUMO) family members, SUMO-2 and SUMO-3. *J Biol*  
860 *Chem* 278, 33416-33421.



- 861 Finn, R.D., Attwood, T.K., Babbitt, P.C., Bateman, A., Bork, P., Bridge, A.J., Chang, H.Y.,  
862 Dosztanyi, Z., El-Gebali, S., Fraser, M., *et al.* (2017). InterPro in 2017-beyond protein family  
863 and domain annotations. *Nucleic Acids Res* *45*, D190-D199.
- 864 Finn, R.D., Coggill, P., Eberhardt, R.Y., Eddy, S.R., Mistry, J., Mitchell, A.L., Potter, S.C.,  
865 Punta, M., Qureshi, M., Sangrador-Vegas, A., *et al.* (2016). The Pfam protein families  
866 database: towards a more sustainable future. *Nucleic Acids Res* *44*, D279-285.
- 867 Gene Ontology, C. (2015). Gene Ontology Consortium: going forward. *Nucleic Acids Res* *43*,  
868 D1049-1056.
- 869 Hammond, C.M., Stromme, C.B., Huang, H., Patel, D.J., and Groth, A. (2017). Histone  
870 chaperone networks shaping chromatin function. *Nat Rev Mol Cell Biol* *18*, 141-158.
- 871 He, N., Chan, C.K., Sobhian, B., Chou, S., Xue, Y., Liu, M., Alber, T., Benkirane, M., and  
872 Zhou, Q. (2011). Human Polymerase-Associated Factor complex (PAFc) connects the Super  
873 Elongation Complex (SEC) to RNA polymerase II on chromatin. *Proc Natl Acad Sci U S A*  
874 *108*, E636-645.
- 875 Hondele, M., and Ladurner, A.G. (2013). Catch me if you can: how the histone chaperone  
876 FACT capitalizes on nucleosome breathing. *Nucleus* *4*, 443-449.
- 877 Jeronimo, C., and Robert, F. (2017). The Mediator Complex: At the Nexus of RNA  
878 Polymerase II Transcription. *Trends Cell Biol*.
- 879 Jundt, F., Raetzl, N., Muller, C., Calkhoven, C.F., Kley, K., Mathas, S., Lietz, A., Leutz, A.,  
880 and Dorken, B. (2005). A rapamycin derivative (everolimus) controls proliferation through  
881 down-regulation of truncated CCAAT enhancer binding protein {beta} and NF-{kappa}B  
882 activity in Hodgkin and anaplastic large cell lymphomas. *Blood* *106*, 1801-1807.
- 883 Kajimura, S., Seale, P., Kubota, K., Lunsford, E., Frangioni, J.V., Gygi, S.P., and  
884 Spiegelman, B.M. (2009). Initiation of myoblast to brown fat switch by a PRDM16-C/EBP-  
885 beta transcriptional complex. *Nature* *460*, 1154-1158.
- 886 Kanashova, T., Popp, O., Orasche, J., Karg, E., Harndorf, H., Stengel, B., Sklorz, M.,  
887 Streibel, T., Zimmermann, R., and Dittmar, G. (2015). Differential proteomic analysis of  
888 mouse macrophages exposed to adsorbate-loaded heavy fuel oil derived combustion  
889 particles using an automated sample-preparation workflow. *Anal Bioanal Chem* *407*, 5965-  
890 5976.
- 891 Kovacs, K.A., Steinmann, M., Magistretti, P.J., Halfon, O., and Cardinaux, J.R. (2003).  
892 CCAAT/enhancer-binding protein family members recruit the coactivator CREB-binding  
893 protein and trigger its phosphorylation. *J Biol Chem* *278*, 36959-36965.
- 894 Kowenz-Leutz, E., and Leutz, A. (1999). A C/EBP beta isoform recruits the SWI/SNF  
895 complex to activate myeloid genes. *Mol Cell* *4*, 735-743.
- 896 Kowenz-Leutz, E., Pless, O., Dittmar, G., Knoblich, M., and Leutz, A. (2010). Crosstalk  
897 between C/EBPbeta phosphorylation, arginine methylation, and SWI/SNF/Mediator implies  
898 an indexing transcription factor code. *EMBO J* *29*, 1105-1115.
- 899 Kowenz-Leutz, E., Twamley, G., Ansieau, S., and Leutz, A. (1994). Novel mechanism of  
900 C/EBP beta (NF-M) transcriptional control: activation through derepression. *Genes Dev* *8*,  
901 2781-2791.



- 902 Kramer, A., and Schneider-Mergener, J. (1998). Synthesis and screening of peptide libraries  
903 on continuous cellulose membrane supports. *Methods Mol Biol* 87, 25-39.
- 904 Krivtsov, A.V., and Armstrong, S.A. (2007). MLL translocations, histone modifications and  
905 leukaemia stem-cell development. *Nat Rev Cancer* 7, 823-833.
- 906 Le Guezennec, X., Vermeulen, M., Brinkman, A.B., Hoeijmakers, W.A., Cohen, A.,  
907 Lasonder, E., and Stunnenberg, H.G. (2006). MBD2/NuRD and MBD3/NuRD, two distinct  
908 complexes with different biochemical and functional properties. *Mol Cell Biol* 26, 843-851.
- 909 Lee, S., Miller, M., Shuman, J.D., and Johnson, P.F. (2010a). CCAAT/Enhancer-binding  
910 protein beta DNA binding is auto-inhibited by multiple elements that also mediate association  
911 with p300/CREB-binding protein (CBP). *J Biol Chem* 285, 21399-21410.
- 912 Lee, S., Shuman, J.D., Guszczynski, T., Sakchaisri, K., Sebastian, T., Copeland, T.D., Miller,  
913 M., Cohen, M.S., Taunton, J., Smart, R.C., *et al.* (2010b). RSK-mediated phosphorylation in  
914 the C/EBP{beta} leucine zipper regulates DNA binding, dimerization, and growth arrest  
915 activity. *Mol Cell Biol* 30, 2621-2635.
- 916 Leutz, A., Pless, O., Lappe, M., Dittmar, G., and Kowenz-Leutz, E. (2011). Crosstalk  
917 between phosphorylation and multi-site arginine/lysine methylation in C/EBPs. *Transcription*  
918 2, 3-8.
- 919 Lichtinger, M., Ingram, R., Hannah, R., Müller, D., Clarke, D., Assi, S.A., Lie-A-Ling, M.,  
920 Noailles, L., Vijayabaskar, M.S., Wu, M., *et al.* (2012). RUNX1 reshapes the epigenetic  
921 landscape at the onset of haematopoiesis. *The EMBO journal* 31, 4318-4333.
- 922 Luo, Z., Lin, C., and Shilatifard, A. (2012). The super elongation complex (SEC) family in  
923 transcriptional control. *Nat Rev Mol Cell Biol* 13, 543-547.
- 924 Lynch, V.J., May, G., and Wagner, G.P. (2011). Regulatory evolution through divergence of  
925 a phosphoswitch in the transcription factor CEBPB. *Nature* 480, 383-386.
- 926 Meszaros, B., Simon, I., and Dosztanyi, Z. (2009). Prediction of protein binding regions in  
927 disordered proteins. *PLoS Comput Biol* 5, e1000376.
- 928 Minde, D.P., Dunker, A.K., and Lilley, K.S. (2017). Time, space, and disorder in the  
929 expanding proteome universe. *Proteomics* 17.
- 930 Mo, X., Kowenz-Leutz, E., Xu, H., and Leutz, A. (2004). Ras induces mediator complex  
931 exchange on C/EBP beta. *Mol Cell* 13, 241-250.
- 932 Mohan, A., Oldfield, C.J., Radivojac, P., Vacic, V., Cortese, M.S., Dunker, A.K., and  
933 Uversky, V.N. (2006). Analysis of molecular recognition features (MoRFs). *J Mol Biol* 362,  
934 1043-1059.
- 935 Mudunuri, U., Che, A., Yi, M., and Stephens, R.M. (2009). bioDBnet: the biological database  
936 network. *Bioinformatics* 25, 555-556.
- 937 Muller, C., Kowenz-Leutz, E., Grieser-Ade, S., Graf, T., and Leutz, A. (1995). NF-M (chicken  
938 C/EBP beta) induces eosinophilic differentiation and apoptosis in a hematopoietic progenitor  
939 cell line. *EMBO J* 14, 6127-6135.
- 940 Muller-McNicoll, M., and Neugebauer, K.M. (2013). How cells get the message: dynamic  
941 assembly and function of mRNA-protein complexes. *Nat Rev Genet* 14, 275-287.

- 942 Nerlov, C. (2008). C/EBPs: recipients of extracellular signals through proteome modulation.  
943 *Curr Opin Cell Biol* 20, 180-185.
- 944 Ness, S.A., Kowenz-Leutz, E., Casini, T., Graf, T., and Leutz, A. (1993). Myb and NF-M:  
945 combinatorial activators of myeloid genes in heterologous cell types. *Genes Dev* 7, 749-759.
- 946 Orphanides, G., LeRoy, G., Chang, C.H., Luse, D.S., and Reinberg, D. (1998). FACT, a  
947 factor that facilitates transcript elongation through nucleosomes. *Cell* 92, 105-116.
- 948 Peterlin, B.M., and Price, D.H. (2006). Controlling the elongation phase of transcription with  
949 P-TEFb. *Mol Cell* 23, 297-305.
- 950 Pless, O., Kowenz-Leutz, E., Knoblich, M., Lausen, J., Beyermann, M., Walsh, M.J., and  
951 Leutz, A. (2008). G9a-mediated lysine methylation alters the function of CCAAT/enhancer-  
952 binding protein-beta. *J Biol Chem* 283, 26357-26363.
- 953 Rappsilber, J., Mann, M., and Ishihama, Y. (2007). Protocol for micro-purification,  
954 enrichment, pre-fractionation and storage of peptides for proteomics using StageTips.  
955 *Nature protocols* 2, 1896-1906.
- 956 Reimand, J., Arak, T., Adler, P., Kolberg, L., Reisberg, S., Peterson, H., and Vilo, J. (2016).  
957 g:Profiler-a web server for functional interpretation of gene lists (2016 update). *Nucleic Acids*  
958 *Res* 44, W83-89.
- 959 Rodier, F., and Campisi, J. (2011). Four faces of cellular senescence. *The Journal of cell*  
960 *biology* 192, 547-556.
- 961 Ruepp, A., Waegel, B., Lechner, M., Brauner, B., Dunger-Kaltenbach, I., Fobo, G.,  
962 Frishman, G., Montrone, C., and Mewes, H.W. (2010). CORUM: the comprehensive  
963 resource of mammalian protein complexes--2009. *Nucleic Acids Res* 38, D497-501.
- 964 Ruthenburg, A.J., Allis, C.D., and Wysocka, J. (2007). Methylation of lysine 4 on histone H3:  
965 intricacy of writing and reading a single epigenetic mark. *Mol Cell* 25, 15-30.
- 966 Schwanhauser, B., Busse, D., Li, N., Dittmar, G., Schuchhardt, J., Wolf, J., Chen, W., and  
967 Selbach, M. (2011). Global quantification of mammalian gene expression control. *Nature*  
968 473, 337-342.
- 969 Schwartz, C., Beck, K., Mink, S., Schmolke, M., Budde, B., Wenning, D., and Klempnauer,  
970 K.H. (2003). Recruitment of p300 by C/EBPbeta triggers phosphorylation of p300 and  
971 modulates coactivator activity. *EMBO J* 22, 882-892.
- 972 Sebastian, T., Malik, R., Thomas, S., Sage, J., and Johnson, P.F. (2005). C/EBPbeta  
973 cooperates with RB:E2F to implement Ras(V12)-induced cellular senescence. *EMBO J* 24,  
974 3301-3312.
- 975 Shilatifard, A. (2012). The COMPASS family of histone H3K4 methylases: mechanisms of  
976 regulation in development and disease pathogenesis. *Annu Rev Biochem* 81, 65-95.
- 977 Siersbaek, R., Nielsen, R., John, S., Sung, M.H., Baek, S., Loft, A., Hager, G.L., and  
978 Mandrup, S. (2011). Extensive chromatin remodelling and establishment of transcription  
979 factor 'hotspots' during early adipogenesis. *EMBO J* 30, 1459-1472.

- 980 Siersbaek, R., Rabiee, A., Nielsen, R., Sidoli, S., Traynor, S., Loft, A., La Cour Poulsen, L.,  
981 Rogowska-Wrzesinska, A., Jensen, O.N., and Mandrup, S. (2014). Transcription factor  
982 cooperativity in early adipogenic hotspots and super-enhancers. *Cell Rep* 7, 1443-1455.
- 983 Slany, R.K. (2009). The molecular biology of mixed lineage leukemia. *Haematologica* 94,  
984 984-993.
- 985 Smith, E., Lin, C., and Shilatifard, A. (2011). The super elongation complex (SEC) and MLL  
986 in development and disease. *Genes Dev* 25, 661-672.
- 987 Smits, A.H., Jansen, P.W., Poser, I., Hyman, A.A., and Vermeulen, M. (2013). Stoichiometry  
988 of chromatin-associated protein complexes revealed by label-free quantitative mass  
989 spectrometry-based proteomics. *Nucleic Acids Res* 41, e28.
- 990 Steinberg, X.P., Hepp, M.I., Fernandez Garcia, Y., Suganuma, T., Swanson, S.K.,  
991 Washburn, M., Workman, J.L., and Gutierrez, J.L. (2012). Human CCAAT/enhancer-binding  
992 protein beta interacts with chromatin remodeling complexes of the imitation switch subfamily.  
993 *Biochemistry* 51, 952-962.
- 994 Sterneck, E., Tessarollo, L., and Johnson, P.F. (1997). An essential role for C/EBPbeta in  
995 female reproduction. *Genes Dev* 11, 2153-2162.
- 996 Stoilova, B., Kowenz-Leutz, E., Scheller, M., and Leutz, A. (2013). Lymphoid to myeloid cell  
997 trans-differentiation is determined by C/EBPbeta structure and post-translational  
998 modifications. *PLoS One* 8, e65169.
- 999 Szklarczyk, D., Franceschini, A., Wyder, S., Forslund, K., Heller, D., Huerta-Cepas, J.,  
1000 Simonovic, M., Roth, A., Santos, A., Tsafou, K.P., *et al.* (2015). STRING v10: protein-protein  
1001 interaction networks, integrated over the tree of life. *Nucleic Acids Res* 43, D447-452.
- 1002 Tompa, P., Davey, N.E., Gibson, T.J., and Babu, M.M. (2014). A million peptide motifs for  
1003 the molecular biologist. *Mol Cell* 55, 161-169.
- 1004 Tsukada, J., Yoshida, Y., Kominato, Y., and Auron, P.E. (2011). The CCAAT/enhancer  
1005 (C/EBP) family of basic-leucine zipper (bZIP) transcription factors is a multifaceted highly-  
1006 regulated system for gene regulation. *Cytokine* 54, 6-19.
- 1007 Tyanova, S., Temu, T., Sinitcyn, P., Carlson, A., Hein, M.Y., Geiger, T., Mann, M., and Cox,  
1008 J. (2016). The Perseus computational platform for comprehensive analysis of (prote)omics  
1009 data. *Nat Methods* 13, 731-740.
- 1010 van der Lee, R., Buljan, M., Lang, B., Weatheritt, R.J., Daughdrill, G.W., Dunker, A.K.,  
1011 Fuxreiter, M., Gough, J., Gsponer, J., Jones, D.T., *et al.* (2014). Classification of intrinsically  
1012 disordered regions and proteins. *Chem Rev* 114, 6589-6631.
- 1013 Weake, V.M., and Workman, J.L. (2012). SAGA function in tissue-specific gene expression.  
1014 *Trends Cell Biol* 22, 177-184.
- 1015 Wethmar, K., Smink, J.J., and Leutz, A. (2010). Upstream open reading frames: molecular  
1016 switches in (patho)physiology. *BioEssays : news and reviews in molecular, cellular and  
1017 developmental biology* 32, 885-893.
- 1018 Wickham, H. (2009). ggplot2. *Elegant Graphics for Data Analysis*.

- 1019 Wickramasinghe, V.O., and Laskey, R.A. (2015). Control of mammalian gene expression by  
1020 selective mRNA export. *Nat Rev Mol Cell Biol* *16*, 431-442.
- 1021 Williams, S.C., Baer, M., Dillner, A.J., and Johnson, P.F. (1995). CRP2 (C/EBP beta)  
1022 contains a bipartite regulatory domain that controls transcriptional activation, DNA binding  
1023 and cell specificity. *EMBO J* *14*, 3170-3183.
- 1024 Wright, P.E., and Dyson, H.J. (1999). Intrinsically unstructured proteins: re-assessing the  
1025 protein structure-function paradigm. *J Mol Biol* *293*, 321-331.
- 1026 Wright, P.E., and Dyson, H.J. (2015). Intrinsically disordered proteins in cellular signalling  
1027 and regulation. *Nat Rev Mol Cell Biol* *16*, 18-29.
- 1028 Xie, H., Ye, M., Feng, R., and Graf, T. (2004). Stepwise reprogramming of B cells into  
1029 macrophages. *Cell* *117*, 663-676.
- 1030 Zhang, and Yinghua, L. (2011). The Expanding Mi-2/NuRD Complexes: A Schematic  
1031 Glance. *Proteomics Insights*, 79.  
1032
- 1033

1034 **Figure legends**

1035 **Figure 1. Outline of PRISMA screen and comparison of data**

1036 **A.** Schematic representation of C/EBP $\beta$  and the distribution of known post-translational  
1037 modifications (PTMs). Conserved regions (CRs) are depicted in colour, while intrinsic  
1038 disordered regions (IDR) are shown in grey. **B.** Schematic description of the workflow of  
1039 protein binding and data acquisition. **C.** Workflow of data and proteomic analysis. **D.** Overlap  
1040 between the two replicates (SET1, SET2) of the PRISMA screen. **E.** Number of proteins in  
1041 the two PRISMA datasets that show consecutive peptide binding (core interactions, dark  
1042 amber). **F.** Overlap of three affinity purification-based datasets of C/EBP $\beta$  interactors as  
1043 described in the literature and combined with data obtained from a proteomic interaction  
1044 screen in SU-DHL1 cells. Overlaps were determined using IP SU-DHL1 as reference dataset  
1045 and thus the numbers add up to the size of this set only (see Material and Methods). **G.**  
1046 Overlap of the PRISMA-derived C/EBP $\beta$  interactor datasets from E (union of SET1 and  
1047 SET2, light amber) with core interactions (dark amber) from the union of the three datasets  
1048 from F (blue). Overlaps are given using the PRISMA-derived data as reference datasets.  
1049 The overlap count using the union of the datasets from F as a reference dataset is denoted  
1050 in brackets.

1051

1052 **Figure 2. Distribution of protein interactions discovered by PRISMA**

1053 **A.** Heatmap of the normalised intensities of interaction partners. The bar-graph (top) shows  
1054 the distribution of accumulated protein interactions by normalised binding intensities for each  
1055 peptide. The tiled peptides of C/EBP $\beta$  (below) are plotted on the horizontal axis, and  
1056 proteins are shown on the vertical axis following non-supervised hierarchical clustering. **B.**  
1057 Prediction of C/EBP $\beta$  interaction regions using 'Anchor' (blue) and 'MoRF' (magenta)  
1058 bioinformatics tools and prediction of intrinsic disorder (grey) in relation to the schematic  
1059 representation of C/EBP $\beta$  and the primary sequence (bottom of A). Different conserved  
1060 regions are coloured as shown in Figure 1A. **C.** Heatmaps of selected complexes.

1061

1062 **Figure 3. PRISMA-based prediction of protein complexes interacting with C/EBP $\beta$**

1063 **A.** Bar-graphs of accumulated normalised intensities for 45 selected complexes. Based on  
1064 CORUM database protein complex annotations, the corresponding normalised intensities of  
1065 proteins identified by PRISMA were extracted and plotted. **B.** Network representation of 14  
1066 potential complexes identified. Nodes are colour-coded according to their detection in  
1067 PRISMA and SU-DHL1 IP experiments (yellow = detected in IP and PRISMA, green =  
1068 detected in IP, dark blue = detected in the PRISMA core set, light blue = detected in  
1069 PRISMA SET1 and 2).

1070

1071 **Figure 4. Validation of site-specific interactions with C/EBP $\beta$**

1072 **A.** Accumulated binding intensities of interaction partners (indicated on the left) from the  
1073 PRISMA screen. Bar-graphs indicate interactions according to the peptide position in  
1074 C/EBP $\beta$ , as schematically shown underneath. **B.** Top: Colour-coded scheme of the C/EBP $\beta$   
1075 protein with dashed lines to aid comparison of constructs shown in B, C, and D. Bottom:  
1076 Bacterially expressed GST-C/EBP $\beta$  constructs (left) and immunoblots (right) showing  
1077 interaction of RelA and Nup50 in nuclear cell extracts with the different C/EBP $\beta$  deletion  
1078 mutants. The most intense signals of RelA and Nup50 are associated with the presence of  
1079 the CR7 region of C/EBP $\beta$ . A, Antibody; IP, immunoprecipitation; IB, Immunoblotting. **C.** Co-  
1080 immunoprecipitation of FLAG-tagged LAP\* C/EBP $\beta$  or three N-terminal C/EBP $\beta$  deletion  
1081 mutants, followed by immunoblot detection of co-precipitated DMAP1. **D.**  
1082 Immunoprecipitation of LAP\* and three different internal deletion mutants of C/EBP $\beta$   
1083 followed by immunoblot detection of GCN5 and Stat3.

1084

1085 **Figure 5. PTM-specific interactions with C/EBP $\beta$**

1086 **A.** PTM-dependent binding to the FPFALRAYLGYQAT peptide of C/EBP $\beta$  CR7. Normalised  
1087 binding intensity is relative to the unmodified peptide. Binding can be categorised into four  
1088 different types; proteins not responding to modifications on C/EBP $\beta$  (yellow, middle),

1089 proteins with reduced binding independent of the PTM (blue, left), proteins with enhanced  
1090 binding independent of the nature of the PTM (red, right), and specific PTM-dependent  
1091 binding (yellow-red, small). **B.** Co-immunoprecipitation with wild-type (WT) C/EBP $\beta$  and two  
1092 mutants abrogating (R $\rightarrow$ A) or mimicking (R $\rightarrow$ L) methylation at R60 or R193. Binding of  
1093 DMAP1 was followed by immunoblotting. DMAP is able to bind to WT and R $\rightarrow$ L mutant  
1094 proteins, but replacement of R60 with an alanine suppresses the binding of DMAP. Similarly,  
1095 TLE3 shows an enhanced binding to the R $\rightarrow$ L mutant compared with the WT protein the  
1096 R $\rightarrow$ A mutant. RelA shows a slightly different binding behaviour, preferring the alanine mimic  
1097 over the leucine mutant and WT forms. **B.** Inverse immunoprecipitation experiment with an  
1098 HA-tagged version of TLE3 was co-expressed with C/EBP $\beta$  and two mutants carrying the  
1099 arginine methylation mimics R193A and R193L. Detection of C/EBP $\beta$  shows enhanced  
1100 binding of C/EBP $\beta$  to R193L C/EBP $\beta$ . **C.** Co-expression of full-length C/EBP $\beta$  (LAP\*), TLE3  
1101 and the histone-arginine methyltransferase CARM1. TLE3 in combination with CARM1 can  
1102 precipitate WT C/EBP $\beta$ , similar to the arginine-methylation mimic R193L.

1103

#### 1104 **Figure 6. C/EBP $\beta$ -interacting multi-protein complexes**

1105 **A.** Co-immunoprecipitation of FLAG-tagged C/EBP $\beta$  and the Ash2/Wdr5 complex. **B.** FLAG-  
1106 tagged C/EBP $\beta$  was co-expressed with GFP-tagged Spt16 and SSRP1. Anti-Flag co-  
1107 precipitates both FACT complex subunits. **C.** Interaction with the super elongation complex.  
1108 Immunoprecipitation of human C/EBP $\beta$  (C/EBP $\beta$ ) pulls down the entire super-elongation  
1109 complex. **D.** Interaction with the NuRD complex. The integral subunits of the NuRD complex  
1110 MBD2 (HA-tagged) and MBD3 (GFDP-tagged) were pulled down by immunoprecipitation.  
1111 Detection by western blotting shows that C/EBP $\beta$  interacts with both subunits.

1112



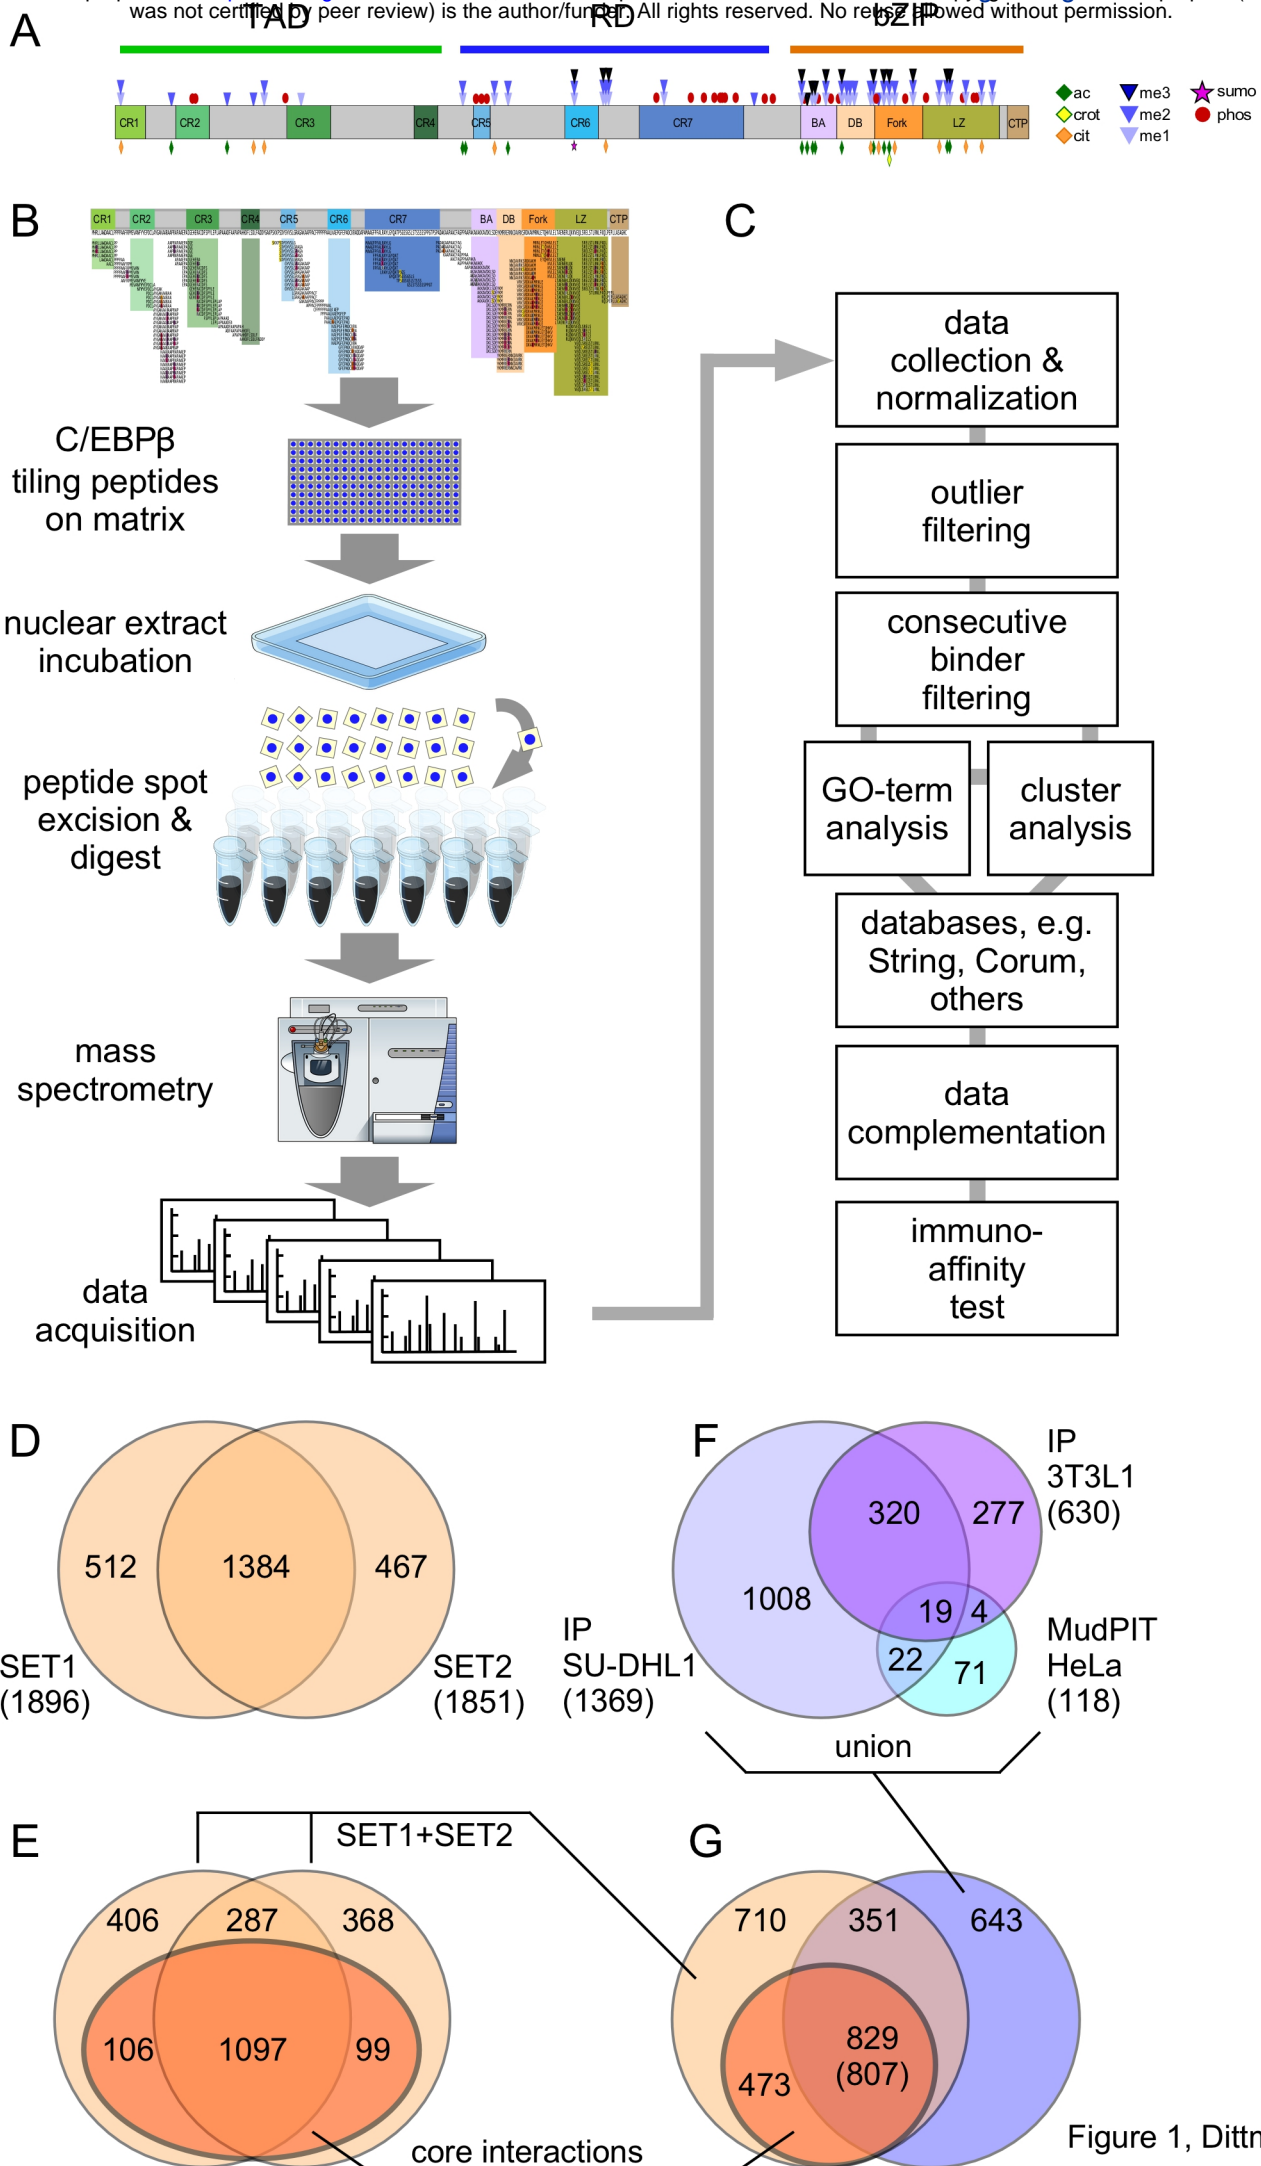

Figure 1, Dittmar et al.



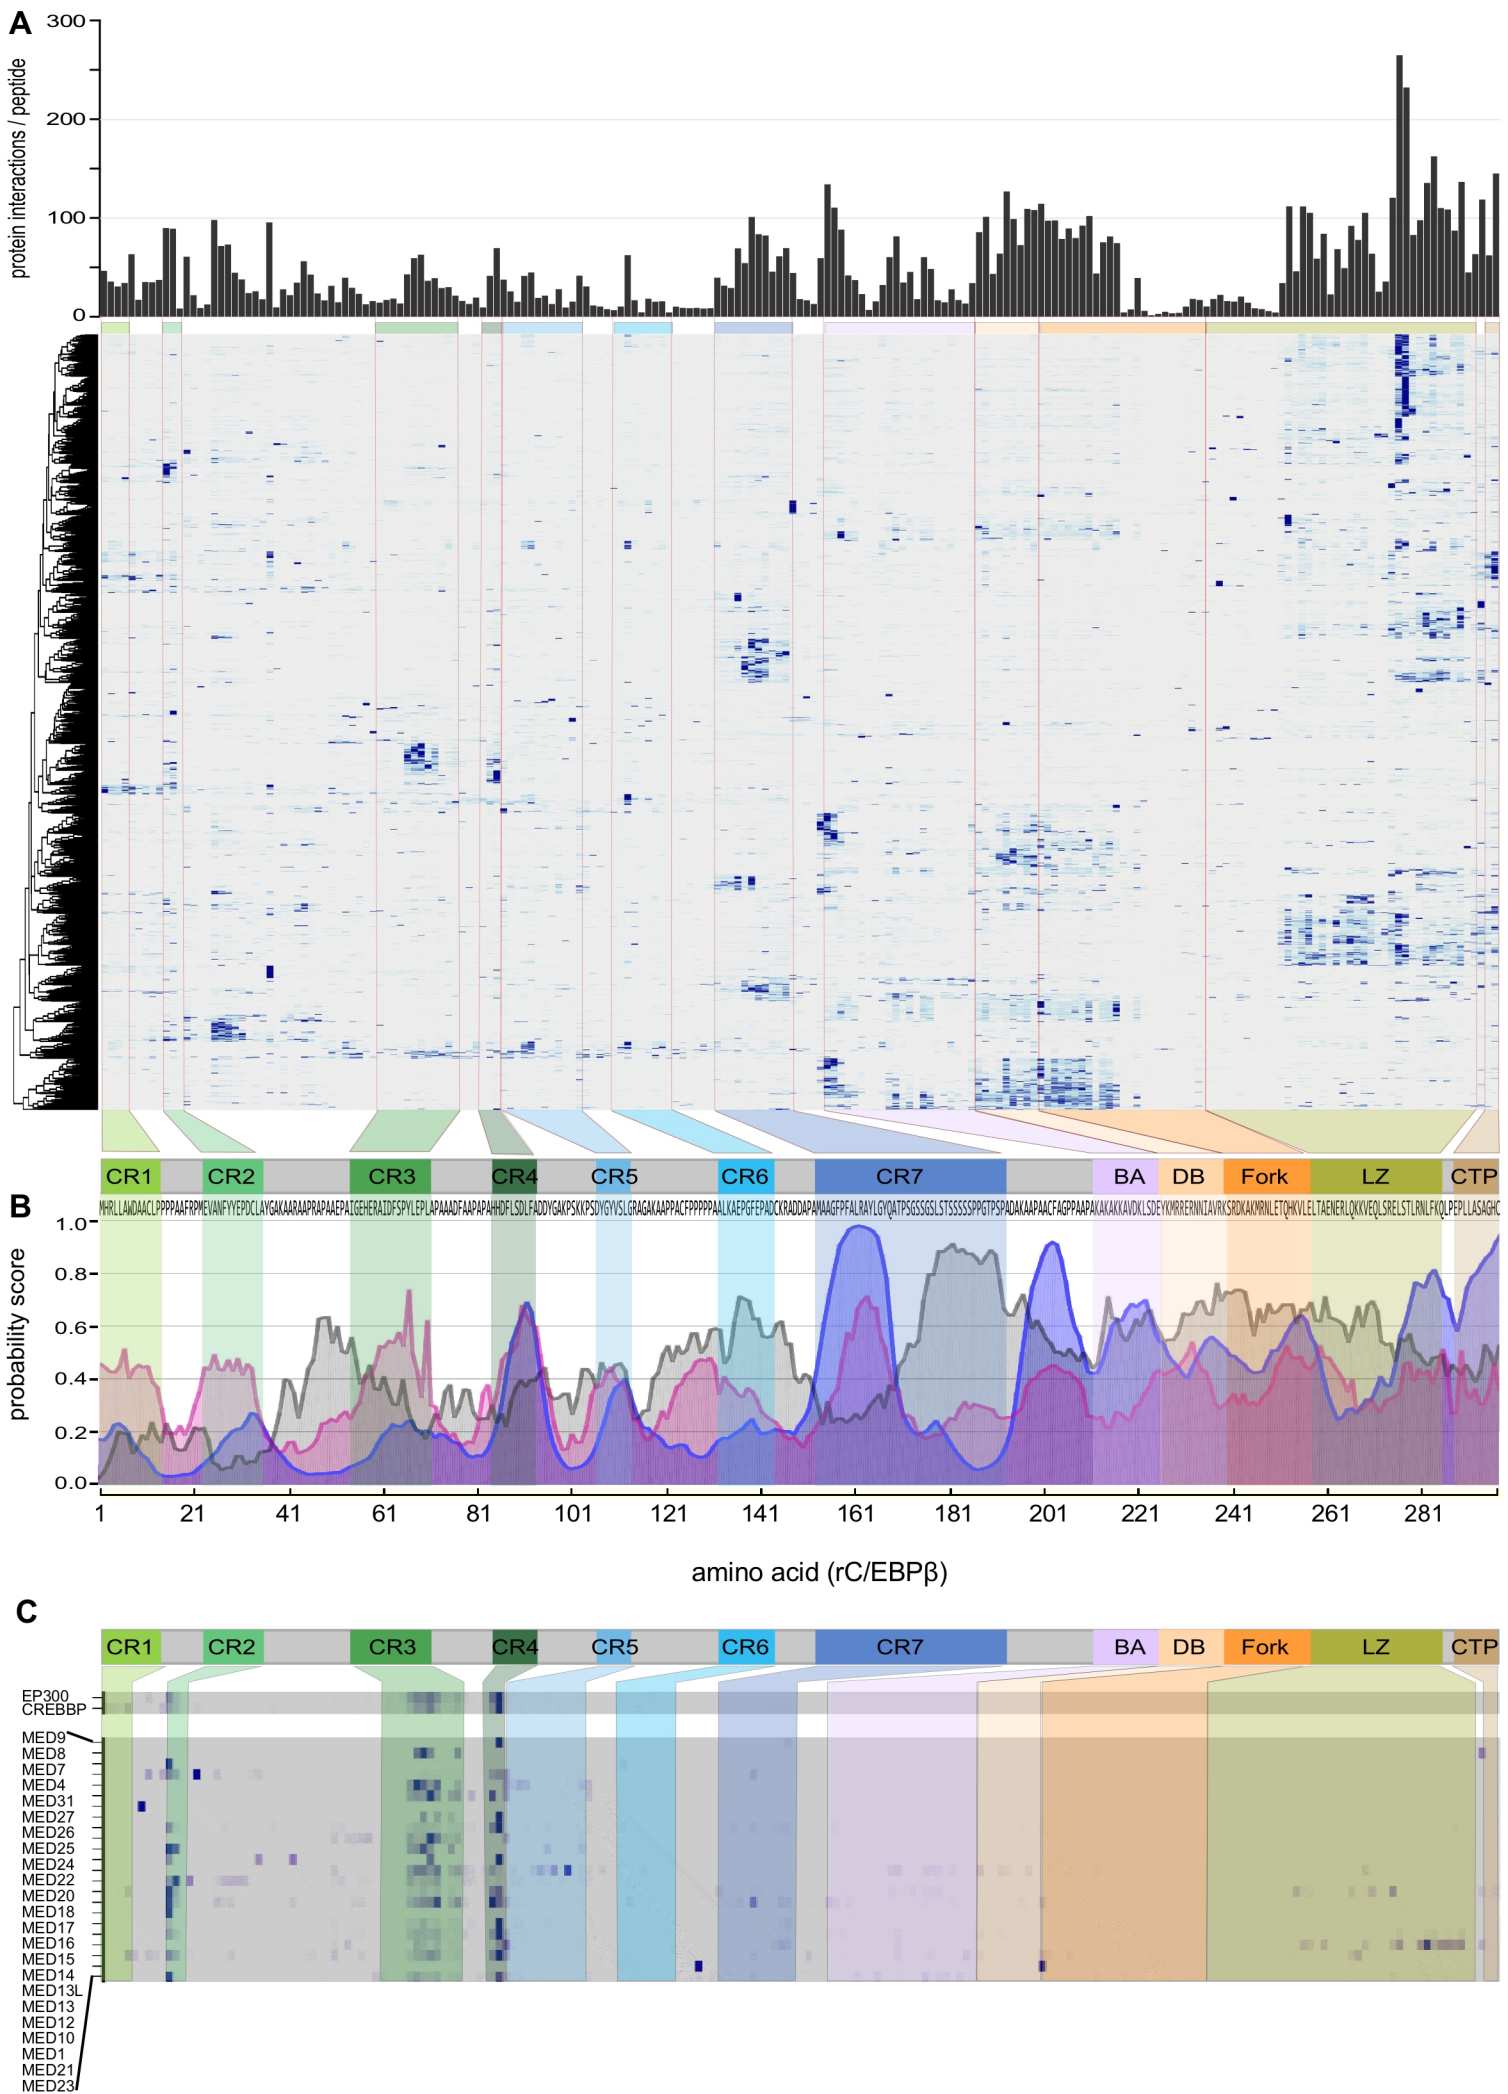

Figure 2; Dittmar et al.

**A**

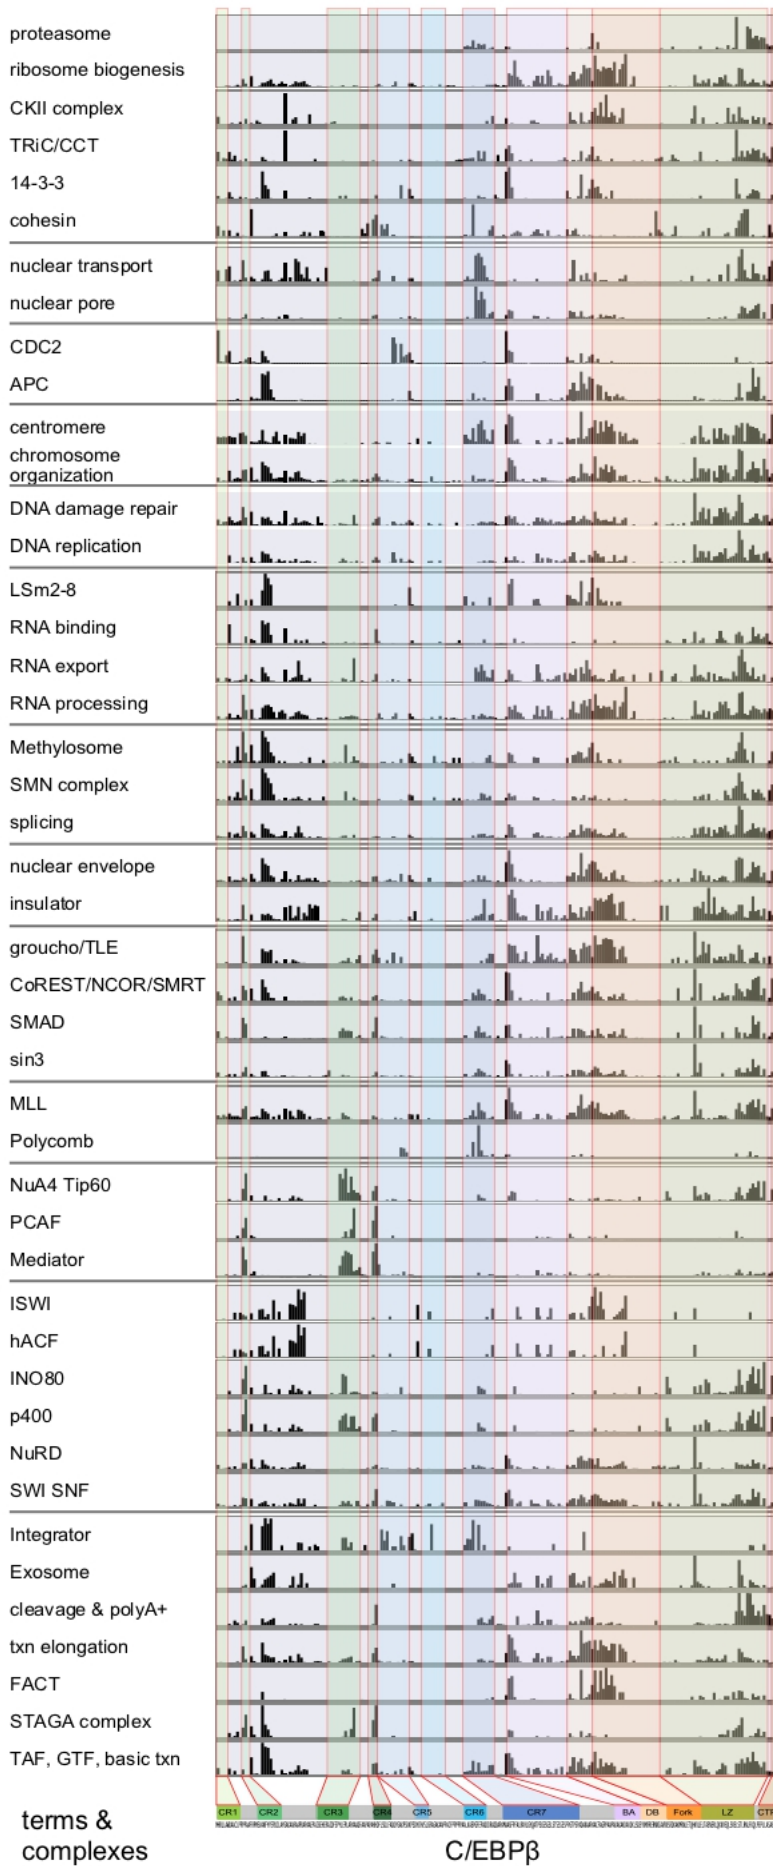

**B**

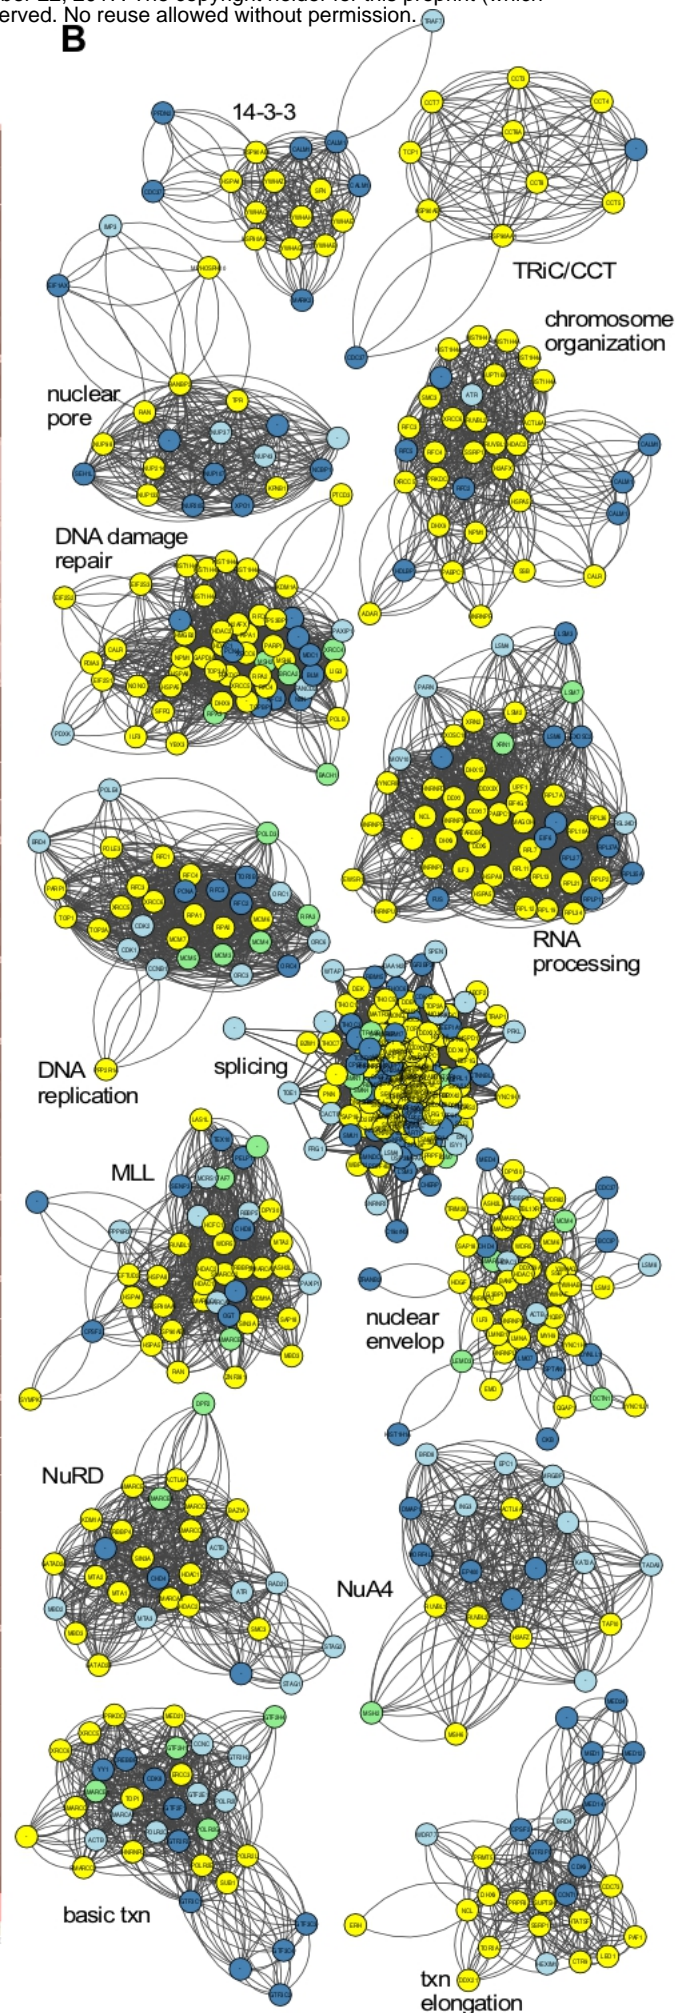

Figure 3; Dittmar et al.



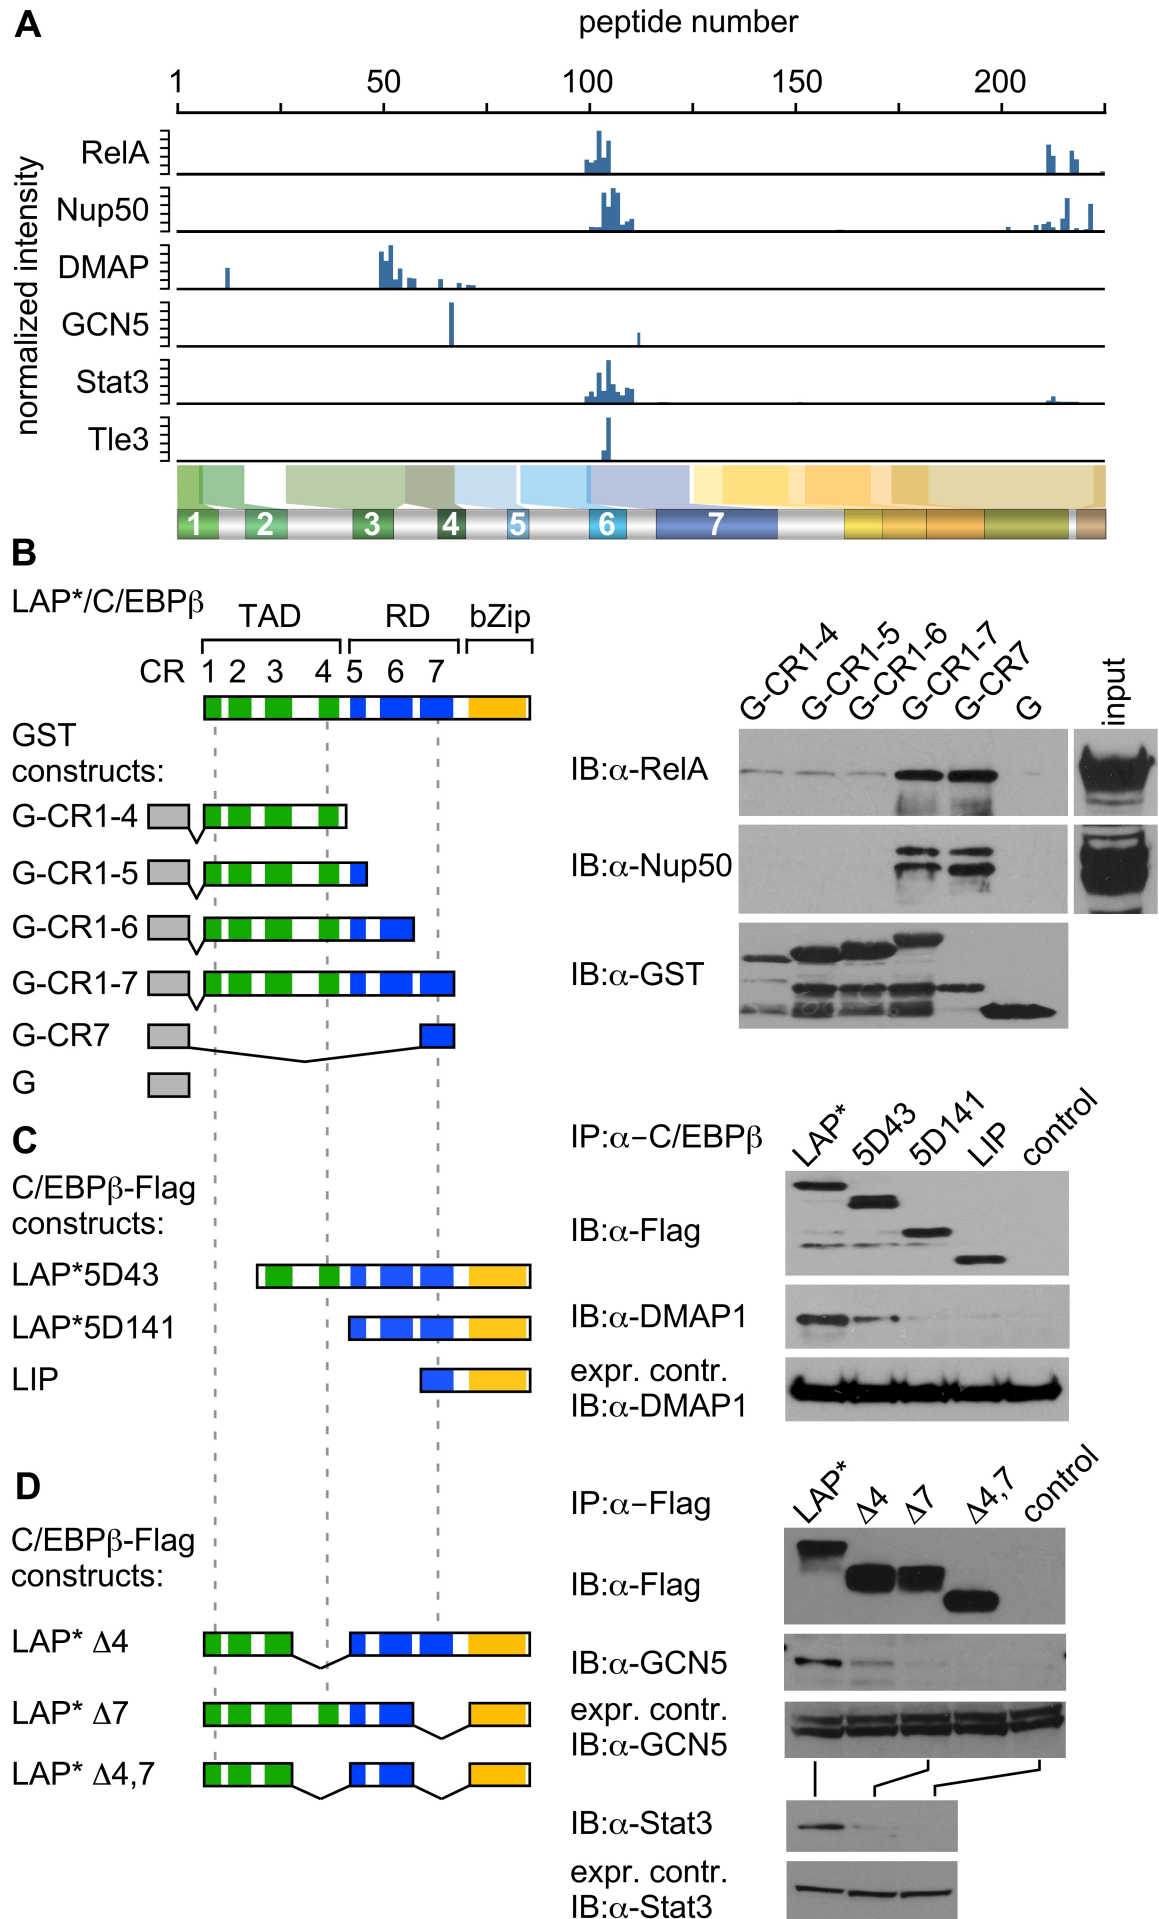

Figure 4; Dittmar et al.

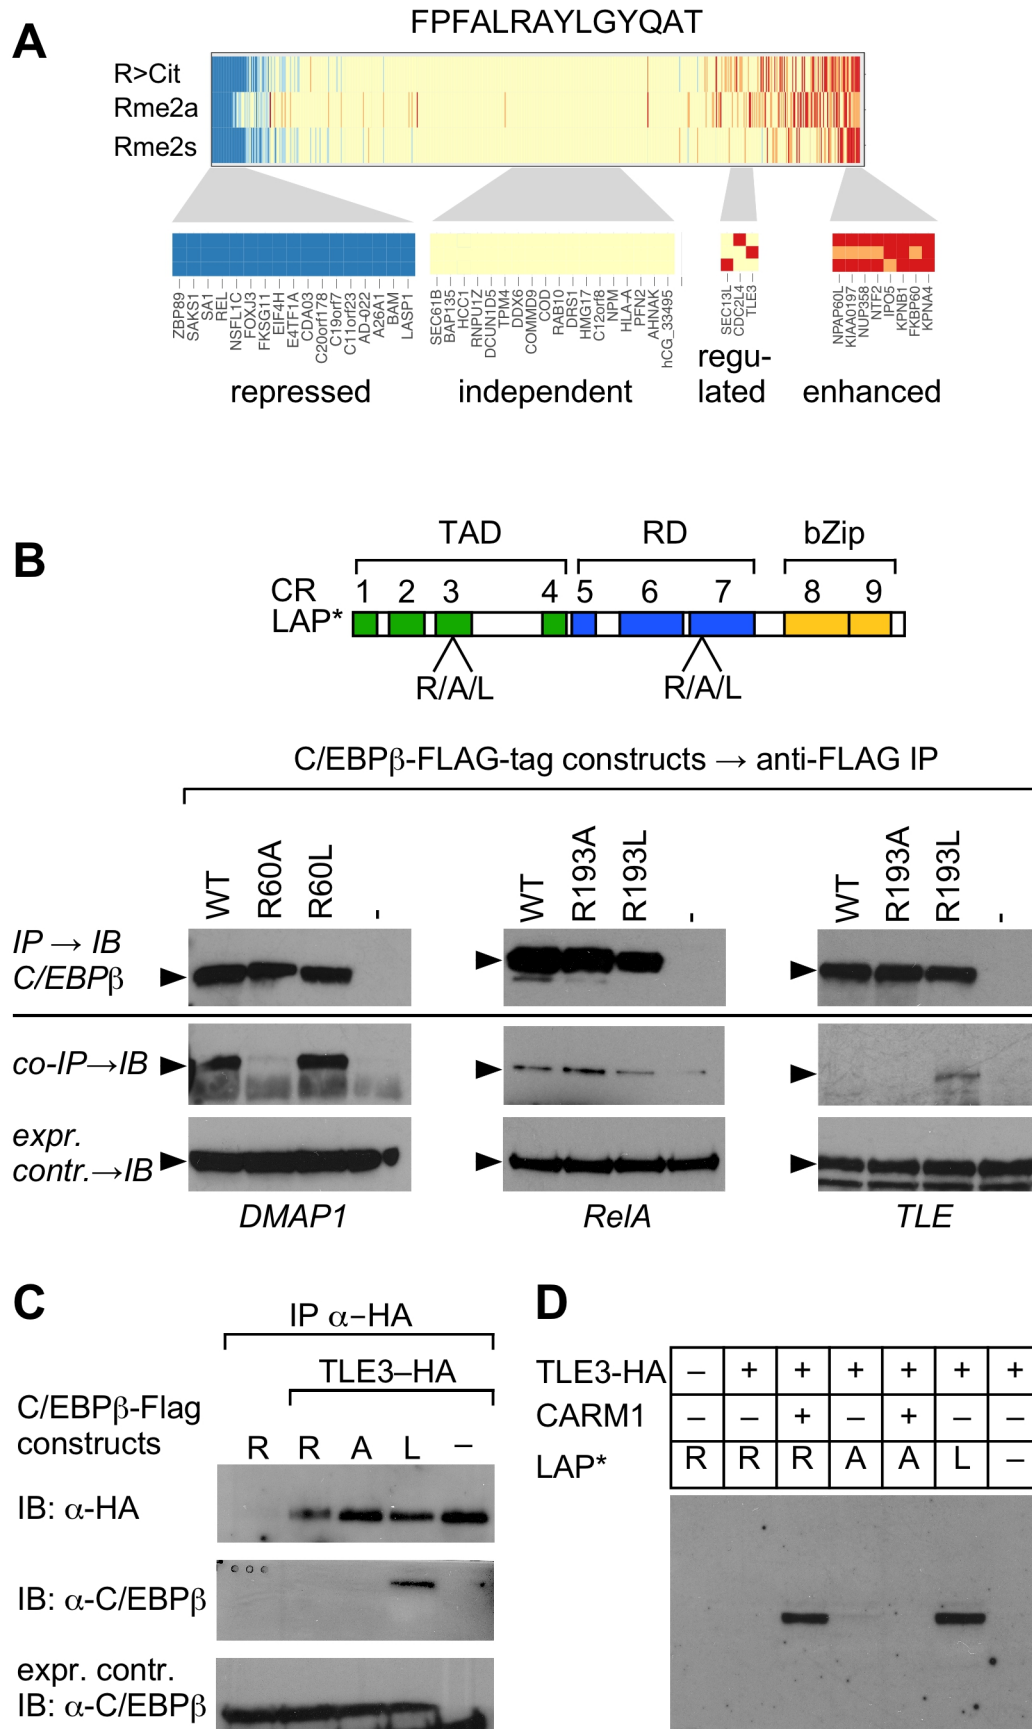

Figure 5; Dittmar et al.

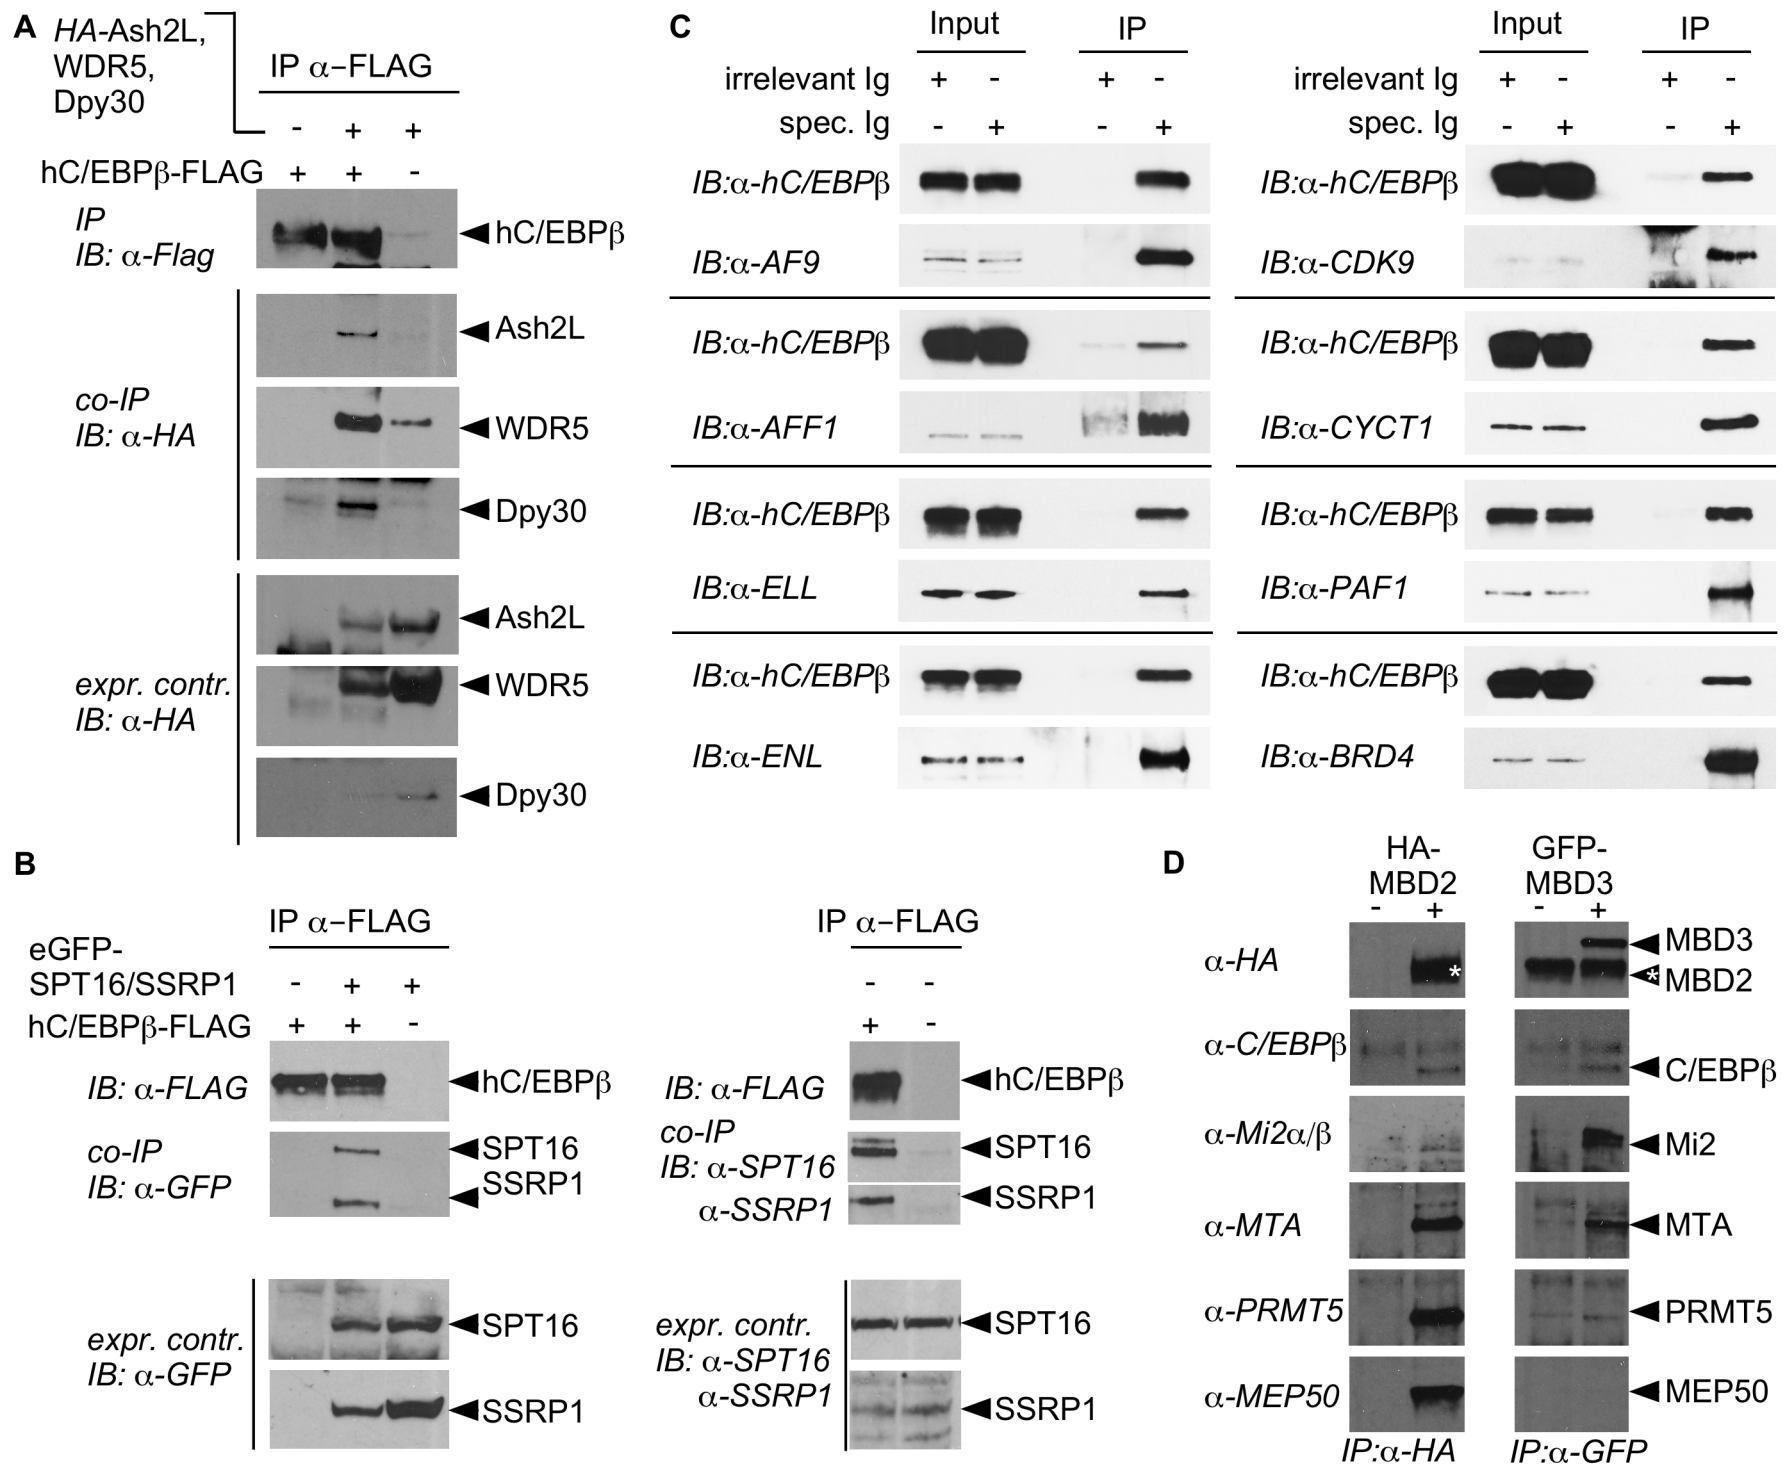

Figure 6; Dittmar et al.

| enrichment score                | pathway / domain description                              | counts in PRISMA | FDR       |
|---------------------------------|-----------------------------------------------------------|------------------|-----------|
| <b>GO: Biological Processes</b> |                                                           |                  |           |
| GO:0010467                      | gene expression                                           | 611              | 4.19e-103 |
| GO:0006355                      | regulation of transcription, DNA-templated                | 301              | 1.27e-07  |
| GO:0006396                      | RNA processing                                            | 267              | 5.63e-128 |
| GO:0007049                      | cell cycle                                                | 211              | 3.06e-31  |
| GO:0008380                      | RNA splicing                                              | 172              | 7.14e-106 |
| GO:0051276                      | chromosome organization                                   | 169              | 1.16e-34  |
| GO:0006461                      | protein complex assembly                                  | 128              | 4.17e-12  |
| GO:0016568                      | chromatin modification                                    | 89               | 2.50e-13  |
| GO:0051169                      | nuclear transport                                         | 86               | 9.46e-38  |
| GO:0006281                      | DNA repair                                                | 84               | 9.48e-17  |
|                                 |                                                           |                  |           |
| <b>GO: Molecular Function</b>   |                                                           |                  |           |
| GO:0003676                      | nucleic acid binding                                      | 745              | 3.8e-199  |
| GO:0003723                      | RNA binding                                               | 607              | 0E+00     |
| GO:0005515                      | protein binding                                           | 534              | 1.92e-40  |
| GO:0003677                      | DNA binding                                               | 269              | 6.43e-17  |
| GO:0005524                      | ATP binding                                               | 216              | 2.82e-24  |
| GO:0003682                      | chromatin binding                                         | 94               | 4.43e-18  |
| GO:0003712                      | transcription cofactor activity                           | 81               | 2.27e-09  |
| GO:0008134                      | transcription factor binding                              | 66               | 5.86e-09  |
| GO:0019900                      | kinase binding                                            | 61               | 3.30e-06  |
| GO:0004693                      | cyclin-dependent protein serine/threonine kinase activity | 17               | 6.20e-10  |
|                                 |                                                           |                  |           |
| <b>GO: Cellular Component</b>   |                                                           |                  |           |
| GO:0000785                      | chromatin                                                 | 103              | 6.04e-31  |
| GO:0005681                      | spliceosomal complex                                      | 85               | 5.10e-56  |
| GO:0005643                      | nuclear pore                                              | 32               | 9.77e-19  |
| GO:0030880                      | RNA polymerase complex                                    | 30               | 2.98e-10  |
| GO:0070603                      | SWI/SNF superfamily-type complex                          | 28               | 9.63e-14  |
| GO:0034708                      | methyltransferase complex                                 | 24               | 4.86e-09  |
| GO:0016592                      | mediator complex                                          | 20               | 3.98e-13  |
| GO:0000178                      | exosome (RNase complex)                                   | 12               | 4.26e-09  |

|                         |                                                         |     |          |
|-------------------------|---------------------------------------------------------|-----|----------|
| GO:0016581              | NuRD complex                                            | 11  | 1.50e-09 |
| GO:0016593              | Cdc73/Paf1 complex                                      | 6   | 1.01e-05 |
|                         |                                                         |     |          |
| <b>Interpro Domains</b> |                                                         |     |          |
| IPR027417               | P-loop containing nucleoside triphosphate hydrolase     | 102 | 9.71e-30 |
| IPR000504               | RNA recognition motif domain                            | 80  | 8.77e-53 |
| IPR005225               | Small GTP-binding protein domain                        | 41  | 2.11e-13 |
| IPR016024               | Armadillo-type fold                                     | 34  | 1.69e-11 |
| IPR017986               | WD40-repeat-containing domain                           | 32  | 6.78e-10 |
| IPR009072               | Histone-fold                                            | 27  | 3.89e-09 |
| IPR001650               | Helicase, C-terminal                                    | 23  | 1.94e-14 |
| IPR011989               | Armadillo-like helical                                  | 21  | 5.11e-06 |
| IPR011545               | DEAD/DEAH box helicase domain                           | 20  | 2.11e-13 |
| IPR002041               | Ran GTPase                                              | 20  | 5.34e-12 |
|                         |                                                         |     |          |
| <b>PFAM Domains</b>     |                                                         |     |          |
| PF00076                 | RNA recognition motif. (a.k.a. RRM, RBD, or RNP domain) | 72  | 4.32e-49 |
| PF00071                 | Ras family                                              | 31  | 8.17e-09 |
| PF00400                 | WD domain, G-beta repeat                                | 29  | 1.38e-10 |
| PF00271                 | Helicase conserved C-terminal domain                    | 23  | 2.27e-14 |
| PF00125                 | Core histone H2A/H2B/H3/H4                              | 23  | 1.89e-09 |
| PF00270                 | DEAD/DEAH box helicase                                  | 20  | 2.63e-13 |
| PF00013                 | KH domain                                               | 10  | 1.36e-06 |
| PF00244                 | 14-3-3 protein                                          | 6   | 2.32e-04 |
| PF01423                 | LSM domain                                              | 9   | 2.32e-04 |
| PF00538                 | linker histone H1 and H5 family                         | 5   | 4.50e-04 |





relation to different PTM-carrying peptides, indicated below the heat maps. Red indicates enhanced binding and blue shows reduced binding.

# Supplemental Figure 1; Dittmar et al.

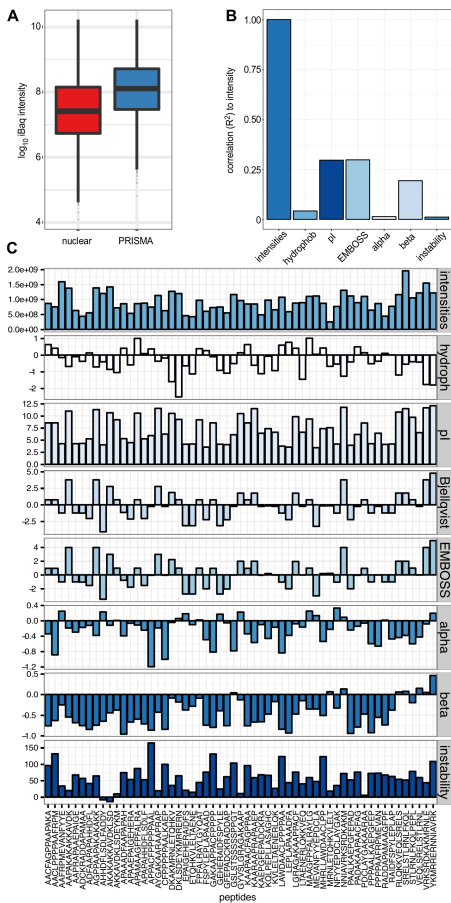

**A**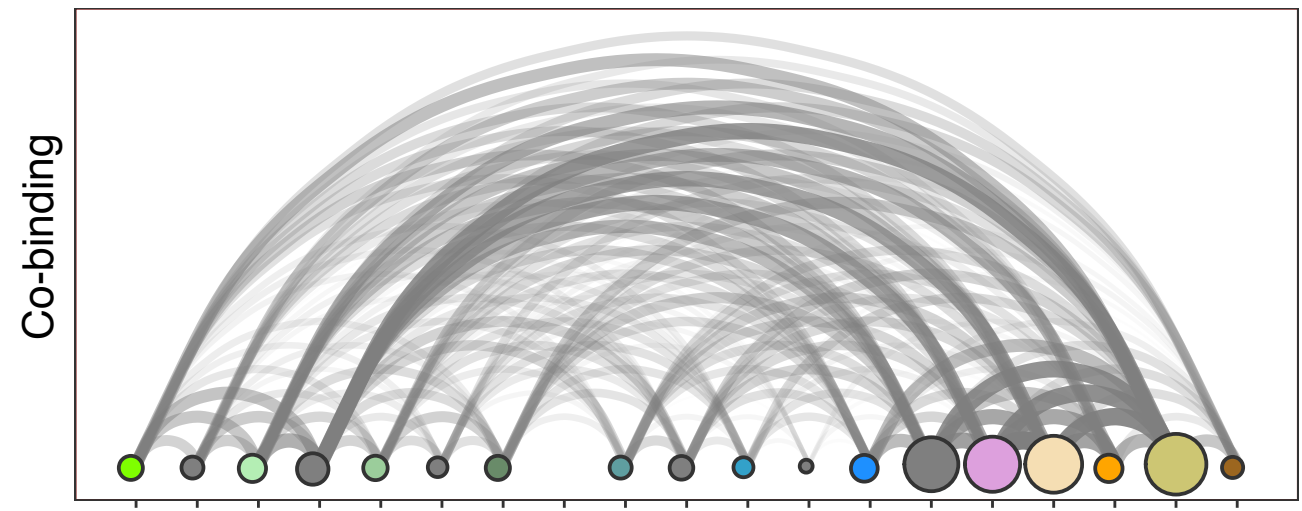**B**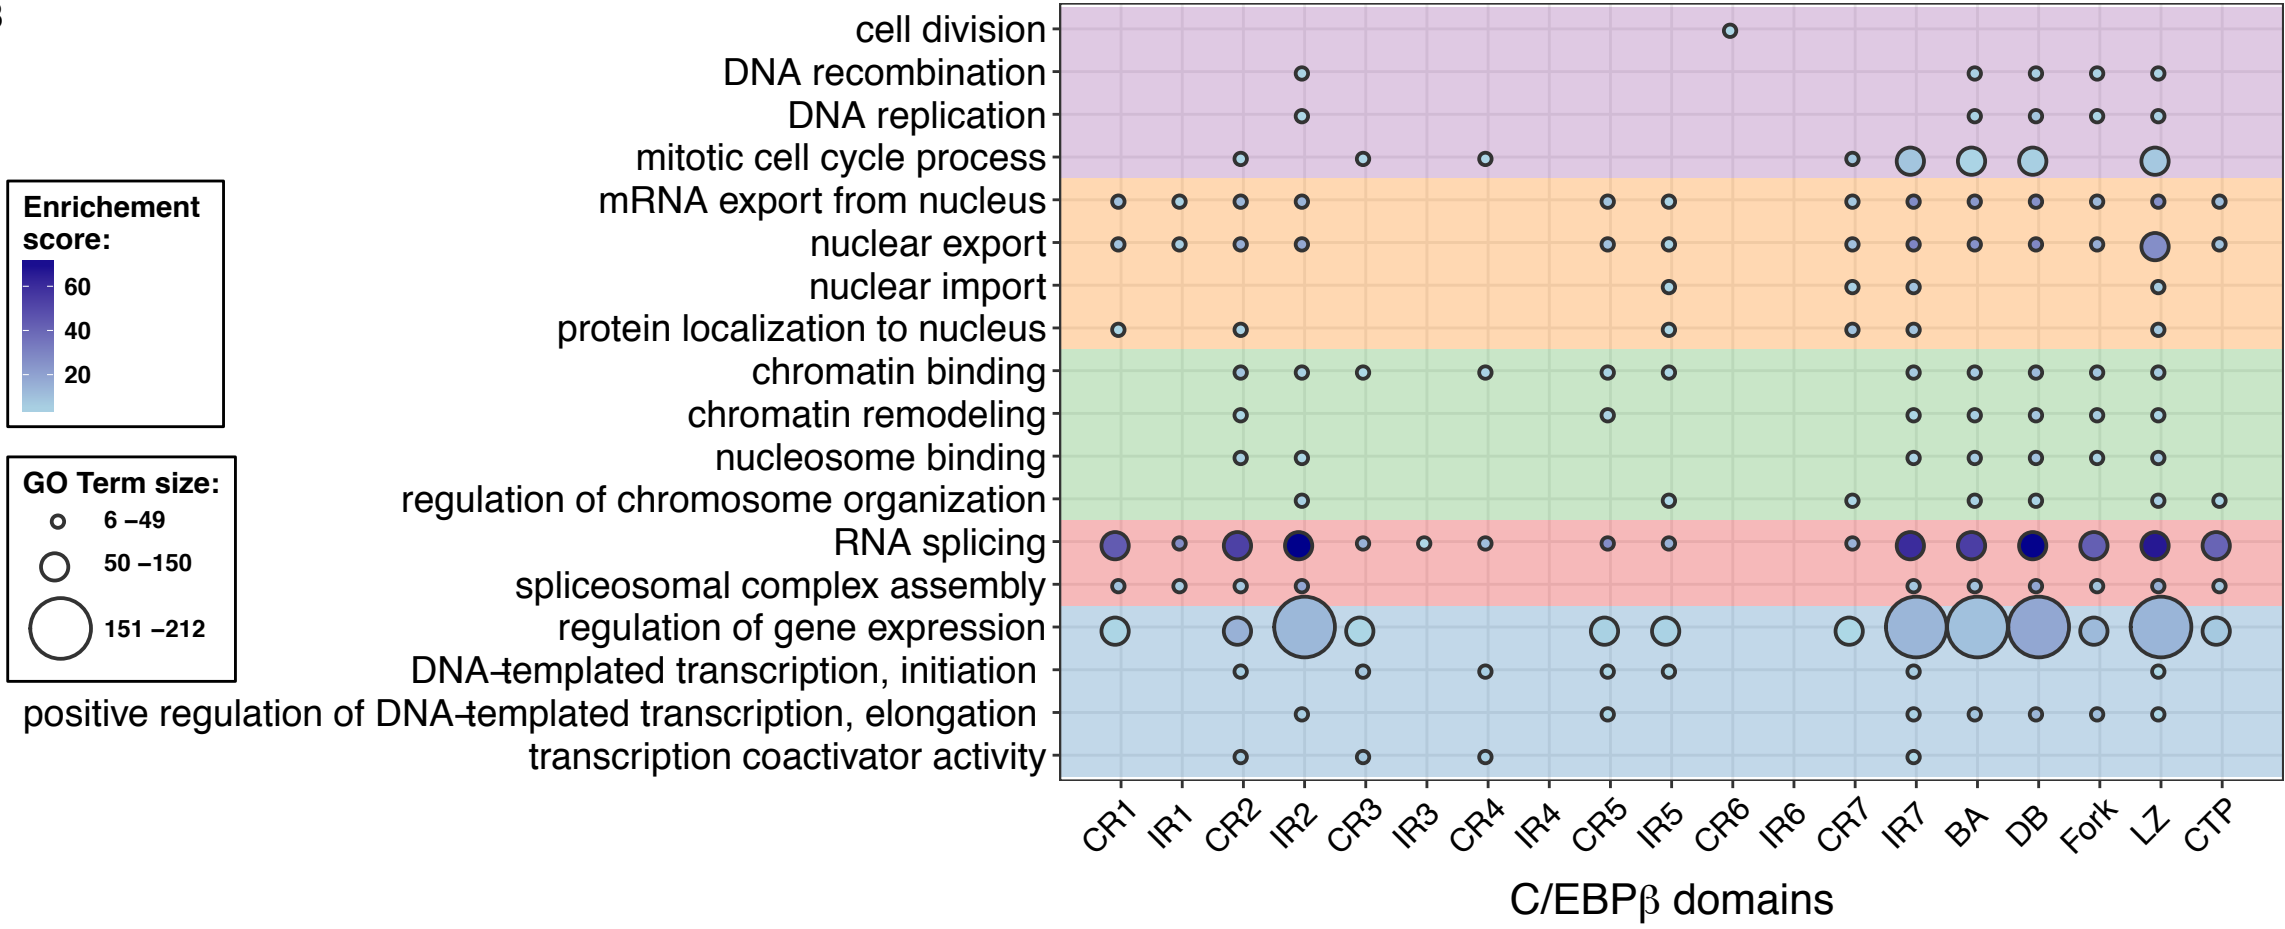

Supplemental Figure 2; Dittmar et al.

Supplemental Figure 3, Dittmar et al.

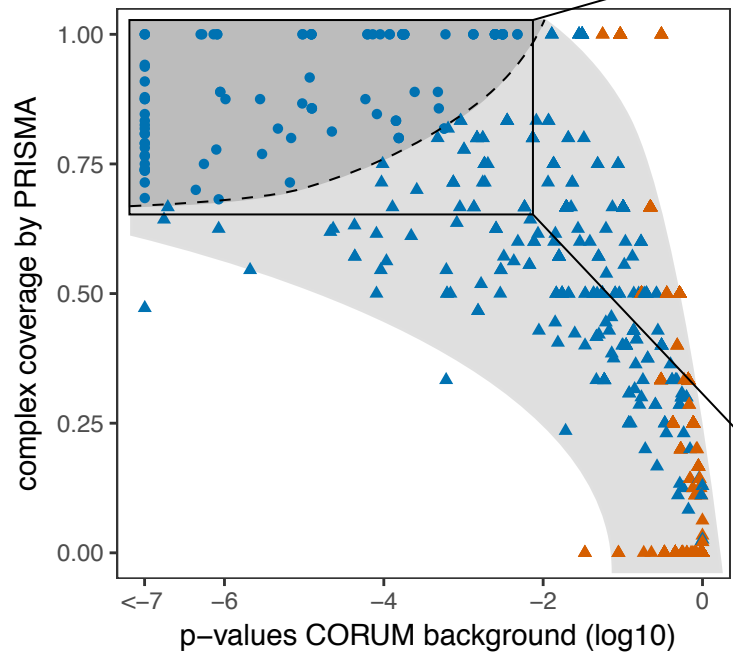

- ▲ complex rank > 104
- complex rank  $\leq$  104

- > 0 PRISMA hits and > 2 hits in PRISMA and SU-DHL1
- 0 PRISMA hits or < 3 hits in PRISMA and SU-DHL1

complex coverage by PRISMA

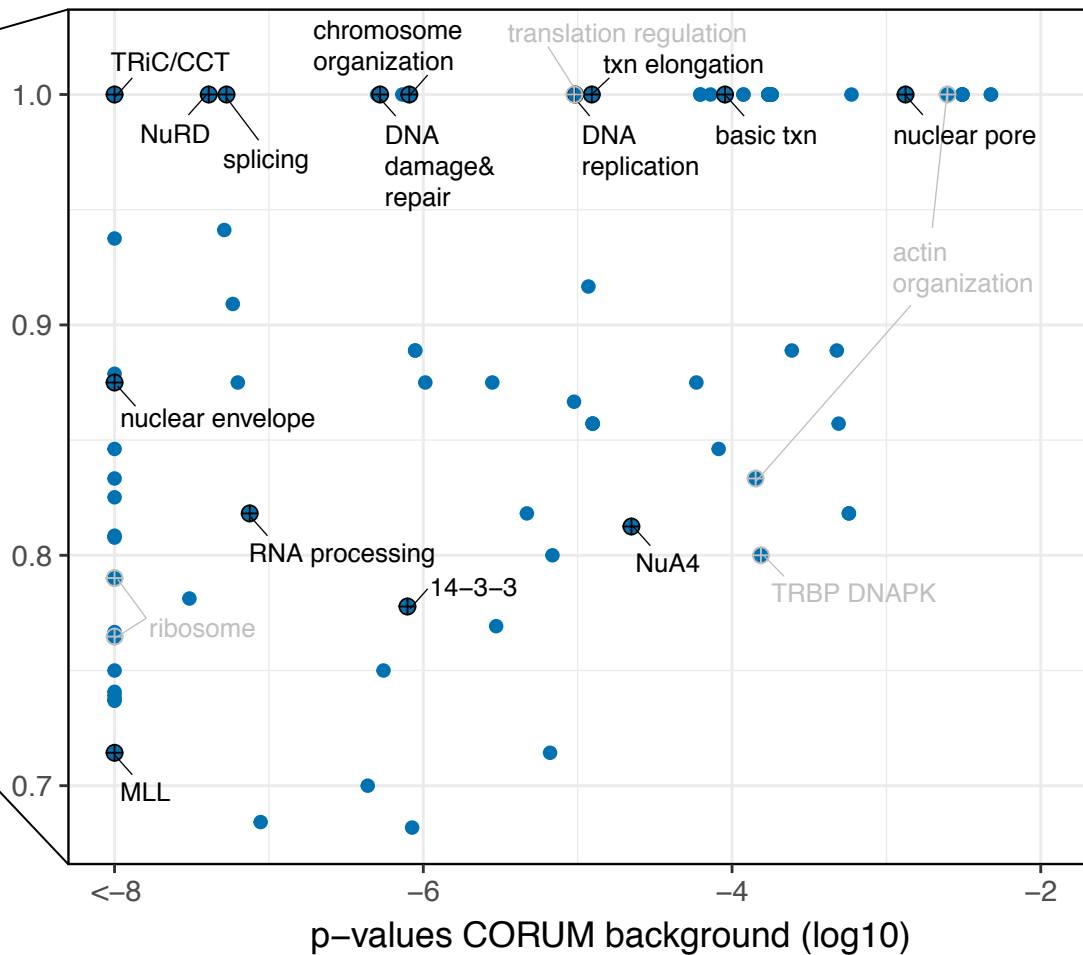

Supplemental Figure 4, Dittmar et al.

bioRxiv preprint doi: <https://doi.org/10.1101/238709>; this version posted December 22, 2017. The copyright holder for this preprint (which was not certified by peer review) is the author/funder. All rights reserved. No reuse allowed without permission.

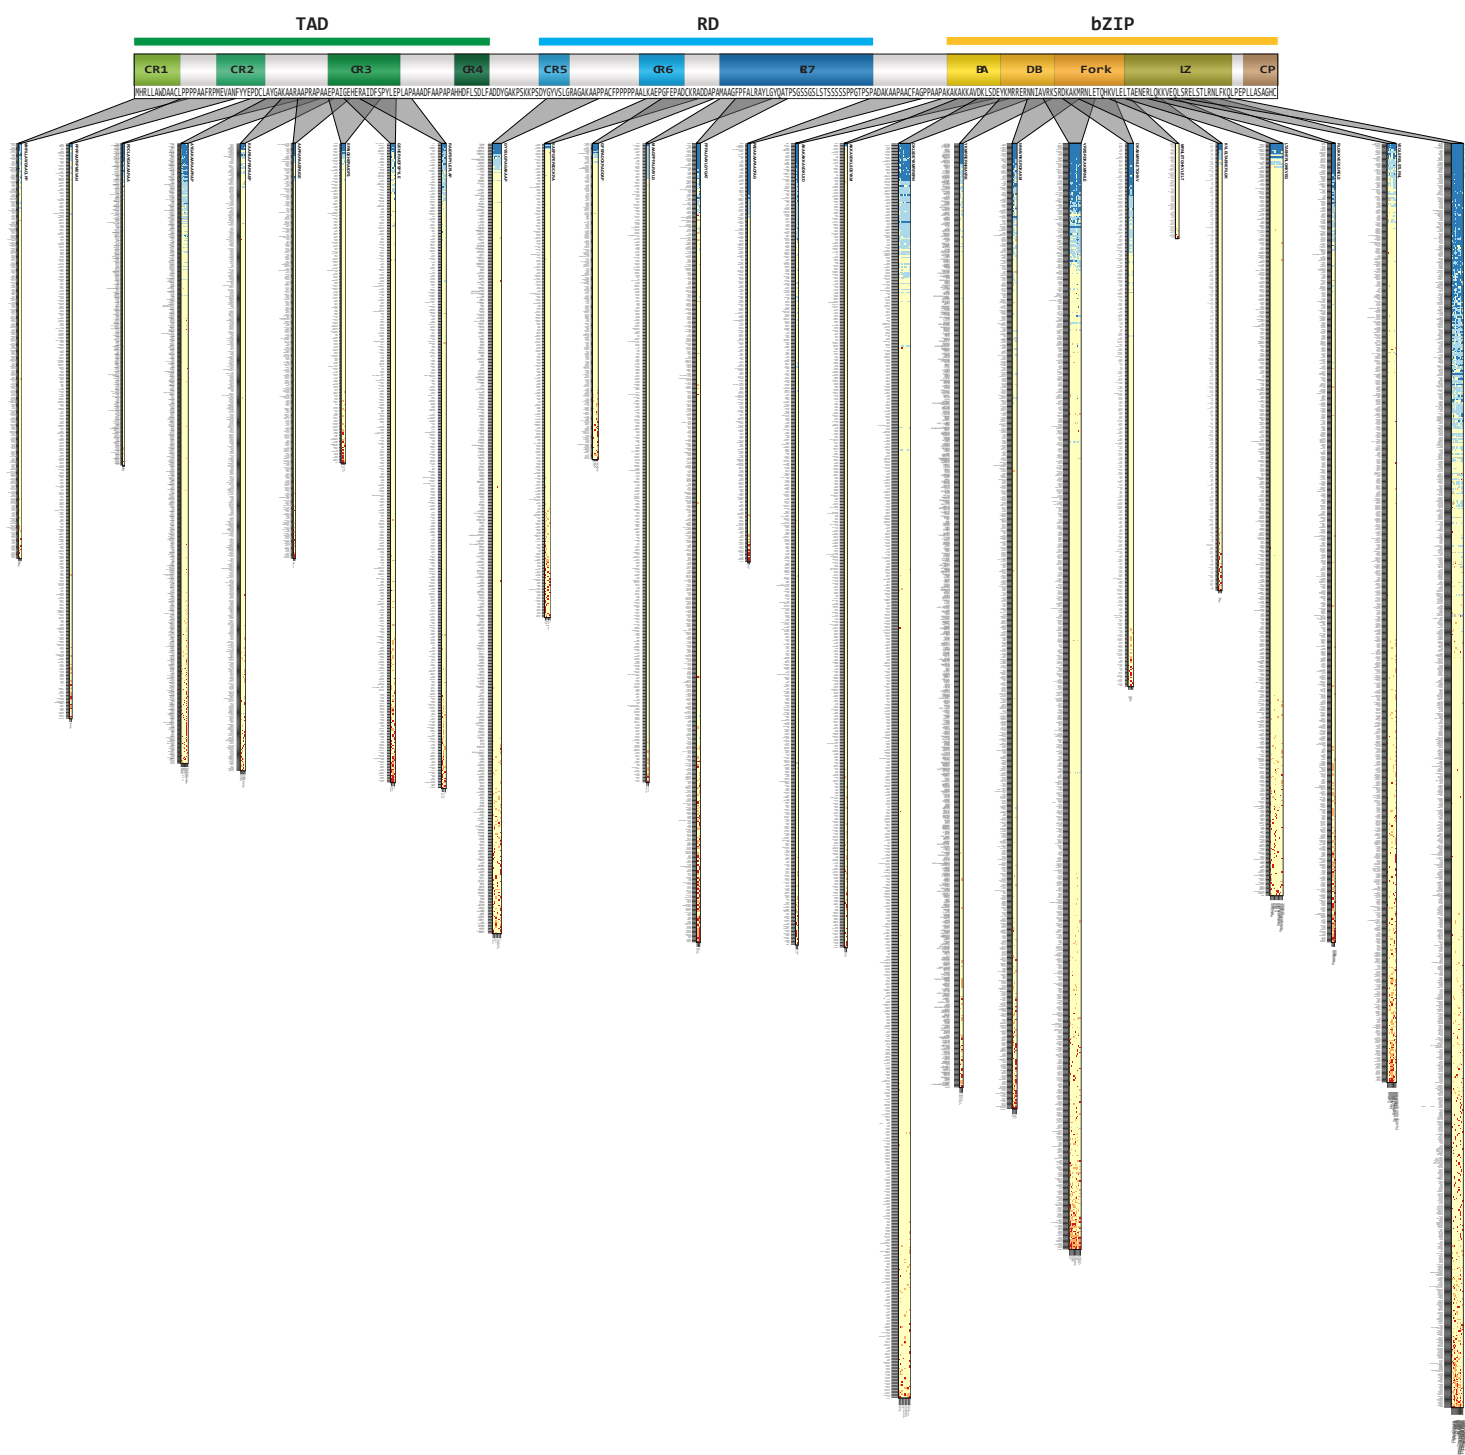

Source: https://www.biorxiv.org/content/10.1101/238709v1.full.pdf
